1 **Comprehensive benchmarking of tools to identify phages in metagenomic shotgun**  
2 **sequencing data**

3

4 Siu Fung Stanley Ho<sup>1</sup>, Andrew D. Millard<sup>2</sup>, Willem van Schaik<sup>1,\*</sup>

5

6 <sup>1</sup> Institute of Microbiology and Infection, College of Medical and Dental Sciences, University  
7 of Birmingham, Birmingham, United Kingdom

8

9 <sup>2</sup> Department of Genetics and Genome Biology, University of Leicester, Leicester, United  
10 Kingdom

11

12 \* Corresponding author: [w.vanschaik@bham.ac.uk](mailto:w.vanschaik@bham.ac.uk).

13

14 **Abstract**

15

16 *Background*

17 As the relevance of bacteriophages in shaping diversity in microbial ecosystems is becoming  
18 increasingly clear, the prediction of phage sequences in metagenomic datasets has become  
19 a topic of considerable interest, which has led to the development of many novel  
20 bioinformatic tools. A comprehensive comparative analysis of these tools has so far not been  
21 performed.

22 *Methods*

23 We benchmarked ten state-of-the-art phage identification tools. We used artificial contigs  
24 generated from complete RefSeq genomes representing phages, plasmids, and  
25 chromosomes, and a previously sequenced mock community containing four phage strains  
26 to evaluate the precision, recall and F1-scores of the tools. In addition, a set of previously  
27 simulated viromes was used to assess diversity bias in each tool's output.

28 *Results*

29 DeepVirFinder performed best across the datasets of artificial contigs and the mock  
30 community, with the highest F1-scores (0.98 and 0.61 respectively). Generally, machine  
31 learning-based tools performed better on the artificial contigs, while reference and machine  
32 learning based tool performed comparably on the mock community. Most tools produced a  
33 viral genome set that had similar alpha and beta diversity patterns to the original population  
34 with the notable exception of Seeker, whose metrics differed significantly from the diversity  
35 of the underlying data.

36 *Conclusions*

37 This study provides key metrics used to assess performance of phage detection tools, offers  
38 a framework for further comparison of additional viral discovery tools, and discusses optimal  
39 strategies for using these tools.

40

## 41 Introduction

42 Bacteriophages (phages) and archaeal viruses are globally ubiquitous, diverse and typically  
43 outnumber their prokaryotic hosts in most biomes [1]. Phages play a key role in microbial  
44 communities by shaping and maintaining microbial ecology by fostering coevolutionary  
45 relationships [2–4]; biogeochemical cycling of essential nutrients [5–7]; and facilitating  
46 microbial evolution through horizontal gene transfer [8–10]. Despite the abundance and  
47 perceived influence phages have on all microbial ecosystems, they continue to be one of the  
48 least studied and understood members of complex microbiomes [11]. Phages are obligate  
49 parasites which require their bacterial host's machinery to replicate, and subsequently  
50 spread via cell lysis. They can either be lytic or temperate, and while the former can only  
51 follow the lytic life cycle, temperate phages can either follow the lytic or lysogenic cycle [12].  
52 During the lytic cycle, phages hijack host cell machinery to produce new viral particles. In the  
53 lysogenic cycle, phages can integrate their genomes into the genome of the bacterial host as  
54 linear DNA or as a self-replicating autonomous plasmid. In addition, an alternative life cycle,  
55 termed pseudolysogeny, has been documented, during which neither phage genome  
56 replication nor prophage formation occurs [13].

57 Traditionally, phage identification and characterisation relied on isolation and culturing  
58 techniques, which are time-consuming and often fail to capture the full repertoire of phages  
59 in an ecosystem as many hosts, and their phages, cannot be cultured under laboratory  
60 conditions [14]. The arrival of high-throughput next generation sequencing has allowed  
61 metagenomic data from various environments to be generated routinely. Metagenomic  
62 sequencing allows direct identification and analysis of all genetic material in a sample,  
63 regardless of cultivability [15]. In metagenomic studies, researchers can opt to either  
64 sequence the whole community metagenome and then computationally isolate viral  
65 sequences, or physically separate the viral fraction before library preparation to produce a  
66 metavirome. The latter approach risks eliminating a large proportion of phages owing to their  
67 association with the cellular fraction, due to their integration into their hosts' genome as  
68 prophages [16], attachment to their hosts' surface [17], or their presence in a  
69 pseudolysogenic state [18–20]. Purification methods may also remove certain types of  
70 phage, e.g. chloroform can inactivate lipid enveloped and/or filamentous phages [21, 22],  
71 increasing sampling bias. The isolation of viral particles frequently results in low DNA yields,  
72 leading to metavirome studies having to use multiple displacement amplification (MDA) to  
73 achieve sufficient quantities of DNA for library generation [11]. MDA has been shown to  
74 produce significant bias into virome composition [23, 24], by preferentially amplifying small  
75 circular ssDNA phage, such as those from the family *Microviridae* [25]. Ideally, the  
76 purification of viral particles will lead to a metavirome with very little host contamination.

77 However, it is very difficult to produce a viral fraction that is devoid of DNA originating from  
78 microbes that are present in the ecosystem [26]. Alternatively, whole community  
79 metagenomic sequencing can present insights into the host and viral fractions concurrently,  
80 allowing host-phage dynamics to be analysed. Integrated phages or prophages which have  
81 been found to be prevalent in some environments [27], can be identified since host genomes  
82 are also sequenced in this process.

83 Many tools for identifying viral sequences from mixed metagenomic and virome assemblies  
84 have been developed in the last five years (Table 1) and we will shortly discuss these here.  
85 VirSorter [28] was one of the first of these, with previous tools focusing on prophage  
86 prediction (PhiSpy [29], Phage\_Finder [30], PHAST/PHASTER [31], ProPhinder [32]) or  
87 virome analysis (MetaVir2 [33], VIROME [34]). VirSorter identifies phage sequences by  
88 detecting viral hallmark genes that have homology to reference databases, and by building  
89 probabilistic models based on different metrics (viral-like genes, PFAM genes,  
90 uncharacterised genes, short genes, and strand switching) which measure the confidence of  
91 each prediction. Since VirSorter's release, other homology based tools (MetaPhinder [35]  
92 and VirusSeeker [36]) have been developed.

93 VirFinder was the first machine learning, reference-free viral identification tool, utilising k-mer  
94 signatures [37]. VirFinder had considerably better performance in recovering viral sequences  
95 than VirSorter, especially on shorter sequences (<5,000 bp). However, it displayed variable  
96 performance in different environments, perhaps due to biases introduced by the reference  
97 data used for training the machine learning model [38]. A number of machine/deep learning  
98 tools have since been published, including DeepVirFinder [39], which boasts increased viral  
99 identification at all contig lengths over its predecessor VirFinder, whilst mitigating the latter's  
100 biases by including various metavirome datasets that contain uncultivated viral sequences.

101 Other recent tools have started utilising alternative approaches. MARVEL [40], integrates the  
102 two approaches described above, using a random forest model to leverage sequence  
103 features (gene density and strand shifts) and homologies (hits to pVOGs (Prokaryotic Virus  
104 Orthologous Groups) database [41]). This allows the tool to identify metagenomic bins that  
105 resemble phages, with comparable specificity but improved sensitivity to VirSorter and  
106 VirFinder. This detection is however currently limited to phages of the *Caudovirales* order.  
107 VIBRANT also employs a hybrid machine learning and protein similarity approach but is able  
108 to recover a diverse array of phages infecting bacteria and archaea, including integrated  
109 prophages. In addition, it characterises auxiliary metabolic genes and pathways after phage  
110 identification.

111 MetaviralSPAdes [42] uses an entirely different approach by leveraging variations in depth  
112 between viral and bacterial chromosomes in assembly graphs. The tool is split into three  
113 separate modules: a specialised assembler based on metaSPAdes (viralAssembly); a viral  
114 identification module that classifies contigs as viral/bacterial/uncertain using a Naive  
115 Bayesian classifier (viralVerify); and a module which calculates the similarity of a constructed  
116 viral contig to known viruses (viralComplete).

117 With the development of so many tools using a variety of approaches, a comprehensive  
118 comparison and benchmarking is needed to evaluate which tools are most useful to  
119 researchers. The performance of each method can vary based on sample content, assembly  
120 method, sequence length, classification thresholds and other custom parameters. To  
121 address these issues, we have benchmarked ten metagenomic viral identification tools using  
122 both artificial contigs, mock communities and real samples.

123

## 124 **Results**

### 125 **Benchmarking with RefSeq phage and non-viral artificial contigs**

126 Ten commonly used tools for viral sequence identification in metagenomes were selected for  
127 evaluation: DeepVirFinder; MARVEL; MetaPhinder; PPR Meta; Seeker; VIBRANT;  
128 ViralVerify; VirFinder; VirSorter; and VirSorter2. All of these tools can be run locally without  
129 the use of a web server; accept metagenomic contigs as input, except MARVEL which  
130 requires bins to be created first; and have been published in the past decade.

131 We first evaluated all the programs on the same uniform datasets. All complete phage  
132 genomes deposited in RefSeq between 1 January 2018 and 2 July 2020 later were  
133 downloaded, quality controlled, and fragmented to create a true positive set of artificial  
134 contigs. A negative set was constructed from all RefSeq bacterial and archaeal plasmids,  
135 and a random 1:10 subsample of all RefSeq bacterial and archaeal chromosomes,  
136 submitted in the same time frame. As chromosomes often have prophages integrated within  
137 them, which would cause tools to falsely identify some contigs as viral, we removed these  
138 with two state-of-the-art prophage detection tools, Phigaro [43] and PhageBoost [44]. The  
139 negative dataset is considerably larger than the true positive dataset as we wanted to  
140 consider the performance of these tools in metagenomic shotgun sequencing datasets which  
141 are typically dominated by non-viral sequences. All evaluated programs, except MARVEL,  
142 produce thresholds or confidence ranges for viral identification. For tools (DeepVirFinder,  
143 MetaPhinder, PPR Meta, Seeker, VirFinder, and VirSorter2) that assign a continuous  
144 threshold (score, identity, or probability), a F1 curve was plotted, and an optimal threshold  
145 was determined (Additional File 1). For VIBRANT, VirSorter and ViralVerify, the categories  
146 that returned the highest F1 score were used. In most tools there was a trade-off between  
147 precision and recall. This is likely due to relaxed thresholds allowing for more viral and non-  
148 viral sequences to be detected, increasing recall, and decreasing precision simultaneously.  
149 Additionally, for VIBRANT and VirSorter, the true positive dataset was run in virome mode  
150 and virome decontamination mode respectively, as this improves viral recovery in samples  
151 composed mainly of viral sequences by adjusting the tools sensitivity [28, 45]. The optimal  
152 settings for each of these two tools found determined using this dataset were then used for  
153 subsequent analyses The tools we benchmarked on this dataset had highly variable  
154 performance in terms of their F1-score (0.36 – 0.99), precision (0.23 – 0.98), and recall (0.46  
155 – 1.00) (Figure 1). DeepVirFinder and its predecessor VirFinder achieved the highest F1-  
156 scores of 0.99 and 0.98 respectively. These tools identified the majority of the true positive  
157 dataset as viral, and classified markedly less of the bacterial chromosome and plasmids  
158 fragments as viral, compared to other tools. PPR Meta, another machine learning based

159 classifier, also performed well with an F1-score of 0.89. The homology-based tool ViralVerify  
160 similarly performed well (F1=0.81) with almost perfect recall (0.98) but a larger proportion of  
161 false positives resulted in a lower precision score (0.69). MetaPhinder, VIBRANT, VirSorter  
162 and VirSorter2 performed similarly (F1-scores of 0.60, 0.71, 0.63 and 0.68 respectively) with  
163 Seeker and MARVEL achieving relatively low scores due to their poor precision (0.39 and  
164 0.36 respectively). Generally, pure machine learning based tools (DeepVirFinder, Seeker,  
165 PPR Meta, VirFinder) outperformed both mixed methods (MARVEL, VIBRANT, VirSorter2)  
166 and reference-based methods (MetaPhinder, ViralVerify, VirSorter) with average F1-scores  
167 of 0.81, 0.58, and 0.68 respectively, although these differences are not statistically  
168 significant due to the small sample sizes. Across our benchmark, every true positive phage  
169 contig was found by at least one tool, with 19.6% (1648/8411) found by all 10 tools  
170 (Additional File 2).

171

## 172 **Benchmarking tools with mock community shotgun metagenomes**

173 We next sought to compare these tools on real community shotgun metagenomic contigs.  
174 Thus, we obtained sequencing data of an uneven mock community created by Kleiner *et al.*  
175 [46], containing 32 species from across the tree of life, including five bacteriophages, at a  
176 large range of cell abundances (0.25%- 21.25%; Additional File 3). This allowed us to  
177 assess the performance of our tools on real data whilst retaining knowledge of the ground  
178 truth (sample composition) and determine each tool's detection limit on low abundance  
179 species. In general, the tools' F1-scores were considerably lower on this dataset than on the  
180 RefSeq artificial contigs, with F1-scores of machine learning-based tools dropping by 42%  
181 and reference-based tools by 33%, compared to the RefSeq benchmark (Figure 2).  
182 DeepVirFinder again outperformed all other tools despite a lower F1-score (0.61) and was  
183 closely followed by MetaPhinder which obtained a similar score to the previous dataset  
184 (0.56). However, DeepVirFinder achieved this score by having a lower recall (0.51) but the  
185 best precision (0.76), with MetaPhinder generating the opposite result, with the highest recall  
186 (0.94) and poorer precision (0.40). VirSorter, PPR Meta, and Seeker achieved comparable  
187 scores of 0.47, 0.47, and 0.46 respectively, with the latter being the only tool that performed  
188 better on this dataset than the first. VirSorter2 attained a lower F1-score (0.35) than its  
189 predecessor in this experiment, as a result of predicting 26.1% more true positive contigs but  
190 returning 166% more false positives, resulting in a low precision score (0.23). MARVEL,  
191 despite now having real bins as input, had a 39% lower F1-score than its RefSeq benchmark  
192 score, which is almost identical to the average decrease in F1-score across tools (40%).  
193 VirFinder, one of the tools that performed very well on the previous dataset, only identified  
194 nine out of 96 viral contigs across the three replicate samples, resulting in a very low recall

195 (0.09) and thus the lowest F1-score of all the tools (0.15). Similarly, ViralVerify performed  
196 poorly with a F1-score of 0.25, as a result of relatively low recall (0.42) and very low  
197 precision (0.17). Unlike in the previous analyses using the RefSeq benchmark dataset,  
198 machine learning based tools and reference-based tools performed almost identically with  
199 average F1-scores of 0.42 and 0.43 respectively, with mixed methods having a lower  
200 average F1-score of 0.30.

201 Out of the four phage species found in the assemblies, no tool was able to identify M13.  
202 PPR Meta, MetaPhinder, ViralVerify, and VirSorter2 were able to identify contigs belonging  
203 to the other three species – F0, ES18, and P22. VirSorter and VIBRANT were able to  
204 identify the three phage strains in two out of three samples and one out of three samples  
205 respectively, missing out contigs belonging to phage ES18. MARVEL predicted two phages  
206 across all samples, F0 and P22, with DeepVirFinder, VirFinder and Seeker only picking up  
207 the most abundant phage strain, F0. No correlation was found between F1-score and the  
208 number of phage strains detected ( $R_s = 0.146$ ,  $p = 0.69$ ) but a positive correlation was  
209 observed between tools that identified more contigs of viral origin (true positives + false  
210 positives), and the number of phage strains identified ( $R_s = 0.726$ ,  $p = 0.02$ ).

211 We also recorded the running times of each tool on this dataset on a high-performance  
212 cluster (8 VCPU) (Figure 3). DeepVirFinder, MetaPhinder, PPR Meta, Seeker, and VirFinder  
213 were the fastest tools finishing each sample in under twenty minutes. Vibrant and ViralVerify  
214 performed their analyses in ~35 mins/sample and 1 hr/sample respectively. VirSorter  
215 required just under two hours to run each sample, with both MARVEL and VirSorter2 taking  
216 over four hours; MARVEL's runtime was over five hours/sample in total, if binning time is  
217 included.

218

### 219 **Impact of tool prediction on diversity metric estimation**

220 To test the impact of these tools on diversity estimates, four simulated mock community  
221 metaviromes containing an average of 719 viral genomes were retrieved from Roux *et al.*  
222 [47]. Reads were mapped to contigs (>1 kb) that were identified as viral by each tool, and  
223 these mapped reads were then mapped to a set of population contigs to estimate their  
224 abundance in each sample. Original reads were also directly mapped to the population  
225 contigs as a control. Read counts were then normalised by their length and sequencing  
226 depth, which Roux *et al.* [47] found to be reliable normalisation method. Diversity estimation  
227 metrics were then calculated using the normalised population counts. All tools returned less  
228 genomes per sample compared to the initial population, although there was significant  
229 variation between tools. DeepVirFinder, MetaPhinder, PPR Meta, and VirFinder retrieved the



230 greatest percentage of genomes with 90.8%, 88.5%, 80.9%, and 88.1% respectively (Figure  
231 4A). All other tools were able to retrieve more than 50% of the genomes with the exception  
232 of Seeker, which was only able to recover 28.7% of the population genomes. All Shannon's  
233 alpha diversities calculated from the count matrices of each tool were within 3% of the initial  
234 population with the exception of Seeker, whose  $H$  score was on average 27.2% lower  
235 (Figure 4B). Similarly, all but two tools identified populations with a Simpson alpha diversity  
236 index that was <1% different from the initial population, with MARVEL and Seeker's being  
237 1.8% and 6.2% divergent, respectively (Figure 4C). MARVEL and ViralVerify, which only  
238 predicted ~50% of the total genomes in the initial population, were the only tools to estimate  
239 a comparatively higher alpha diversity than the initial population. For beta diversity, pairwise  
240 Bray-Curtis dissimilarities within a sample were small between all tools except for Seeker  
241 (Additional File 4), whose Analysis of Similarity (ANOSIM) showed significant dissimilarity  
242 when compared to other tools ( $r = 0.495$ ,  $p = 0.0002$  with Benjamini–Hochberg correction for  
243 multiple comparisons) (Figure 4D; Additional File 5).

244

## 245 **Discussion**

246 Bacteriophages are crucial members of microbial communities in nearly every ecosystem on  
247 Earth and are responsible for controlling host population size as well as having wider  
248 impacts on community functions. Tools designed to recover viral sequences from mixed  
249 community metagenomic and virome samples are fundamental to studying the role of  
250 bacteriophages in the wider context of their environment. Advancements in this field have  
251 produced an extensive suite of viral identification tools that each claim to improve on the  
252 performance of similar tools. Selecting which tool among these is ideal for a certain dataset  
253 is thus not straightforward, especially as each novel tool typically only benchmarks against  
254 two or three other existing tools. Most tools developed for this purpose, especially those  
255 released in recent years have utilised machine/deep learning to classify sequences, whereas  
256 others rely on direct sequence similarity to databases. Both these approaches have potential  
257 to improve over time with newly discovered viral genomes being added to training datasets  
258 and databases.

259 Here, we compare ten methods for identifying viral sequences from metagenomes across  
260 three datasets. We first benchmarked the tools on positive and negative datasets to evaluate  
261 their performance on an ideal set of contigs (size  $\geq 1$  kb, without mis-assemblies), and  
262 determine approximate optimal thresholds. There was no significant difference in  
263 performance between machine learning and similarity-based classifiers, although the  
264 variance within these categories were high. DeepVirFinder and VirFinder, which were the  
265 only tools benchmarked that rely on k-mer frequencies, outperformed all other tools,  
266 exemplifying the power of this method. Machine learning tools performed better than  
267 reference and mixed-method tools, although the relatively low number of tools compared  
268 here may not mean that this is a generalisable observation. Prior to this study, we expected  
269 that mixed-method tools would gain an edge by providing the benefits of both machine  
270 learning and reference-based methods and minimising their weaknesses, but this does not  
271 seem to have been realised in the current generation of tools. Whilst the optimal thresholds  
272 that we determined may not necessarily be ideal for all other datasets, we believe they can  
273 be used as a basis for further usage of these tools as in each case they produced  
274 considerably better results than the default parameters. We therefore encourage  
275 researchers to apply these thresholds and parameters within the context of their prospective  
276 dataset.

277 When tested on real metagenomic data, most tools performed significantly worse compared  
278 to the RefSeq dataset, although DeepVirFinder had the best performance, along with  
279 MetaPhinder. Generally, reference similarity tools had a lower drop in F1-score compared to

280 the RefSeq dataset than deep learning tools, which is probably due to the presence of only  
281 four phage strains in each sample, all of which are widely available in the public databases  
282 used by these programs. This suggests that when studying metagenomic datasets where  
283 viral species are expected to be present at low frequencies, or where only a few phage  
284 strains of interest are being searched for, reference-based tools such as MetaPhinder or  
285 VirSorter are reasonable choices, especially when recall is more important than precision.  
286 When high precision is preferred, DeepVirFinder is the ideal choice, whilst also producing  
287 the best F1-score overall. Runtime and computational load are also important factors to  
288 examine, since these can become practical limitations if large samples take many hours or  
289 days to be analysed. Most tools were reasonably fast, although a few took multiple hours to  
290 complete their run. Generally, tools that only relied of machine learning prediction were  
291 considerably faster. It is important to note that VIBRANT, VirSorter, and VirSorter2 annotate  
292 the identified viral genomes and predict prophages and MARVEL's pipeline produces  
293 metagenomic bins at the expense of runtime, although these can be useful for some  
294 applications.

295 We also gauged any potential biases and impact these tools may have on the diversity of its  
296 predicted viral population. Most tools performed well with alpha diversity indices within 10%  
297 of the default population with the exception of Seeker which returned a considerably lower  
298 value due to the very low number of viral population genomes Seeker originally predicted.  
299 Some tools such as MARVEL and ViralVerify predicted higher alpha diversity than default  
300 population. This is due to the tools missing some high abundance genomes from their  
301 predictions, resulting in a more even diversity distribution. When evaluating beta diversity,  
302 Seeker was the only tool that produced results that had significant dissimilarity from the  
303 other tools and did not cluster with the other programs, again as a result of the low  
304 proportion of genomes it recovered in this dataset. Hence beta diversity trends of the tools  
305 examined here, with the exception of Seeker, are accurate to the original population, even  
306 when only half the genomes are recovered.

307 Although these benchmarks comprehensively compared the performance of state-of-the-art  
308 tools, there are a number of limitations with our study. First, whilst an effort was made to  
309 benchmark the machine learning based tools on data that it was not trained on, not all tools  
310 segregated their datasets by date or were not trained on NCBI RefSeq genome data (PPR  
311 Meta, VIBRANT, VirSorter2, ViralVerify), so there may be instances of overlap between a  
312 tool's training dataset and our RefSeq benchmark contig set. Second, whilst we use RefSeq  
313 genomes, and a mock metagenomic community to benchmark these tools, we did not  
314 address the tools' ability to identify viral sequences belonging to different phage families.  
315 Some tools such as MARVEL are specifically designed to detect certain families (those

316 within the order *Caudovirales*), and would therefore not perform as well on other phage  
317 families such as the *Microviridae* [11]. Third, we used the default database or the original  
318 trained model that was provided with each tool. Whilst providing each tool the same  
319 database, or dataset to be trained on, may have been a fairer comparison of the underlying  
320 algorithms, this was beyond the scope of our study. We note that most routine users are also  
321 unlikely to retrain these tools prior to their use. Fifth, we did not assess the performance of  
322 combining multiple tools, which could provide meaning insights that would be missed when  
323 only one single tool is used, as in Marquet *et al.* [48] where the authors combined multiple  
324 tools into a single workflow. Finally, a few recently developed tools we found during our  
325 study were not included in our benchmarking either due to (1) requiring the use of its own  
326 web server and therefore not being scalable (VIROME, VirMiner), (2) lack of clear  
327 installation/running instructions (ViraMiner), or (3) errors when attempting to use the tool that  
328 we were unable to resolve (PhaMers, VirNet, VirMine).

## 329 **Conclusion**

330 Our comprehensive, comparative analysis of 10 currently available metagenomic  
331 virus/phage identification tools provides valuable metrics, and insights for other investigators  
332 to use and build on. Using mock communities and artificial datasets, precision, recall and  
333 biases of these tools could be calculated. By adjusting the filtering thresholds for viral  
334 identification for each tool and comparing F1 scores, we were able to optimise performance  
335 in every case. Among the tested tools, DeepVirFinder performed best, with the highest F1-  
336 score in both the artificial RefSeq contig and mock uneven community datasets, whilst  
337 displaying similar diversity indices to the original population. All tools, except Seeker, were  
338 able to produce a diversity profile with similar indices to the original population, and are  
339 therefore suitable for phage ecology studies. DeepVirFinder was also one of the fastest tools  
340 in our study as were all other solely machine learning based tools such as PPR Meta, and  
341 Seeker. Generally, we suggest that of currently available tools DeepVirFinder should be  
342 considered the as an optimal solution in most cases, although this will depend on the type of  
343 sample that is analysed, whether precision or recall is more valued, and whether the  
344 additional functionality of other tools is required.

345

## 346 **Materials and Methods**

347

### 348 **Benchmarking with RefSeq dataset**

349 Complete bacterial and archaeal chromosomes and plasmids, and phage genomes  
350 deposited in RefSeq [49] since January 2018 (inclusive) were downloaded (2 July 2020).  
351 Chromosomes were then randomly down-sampled by a factor of 10, using reformat.sh from  
352 BBTools suite [50], to reduce downstream computational load. Phigaro [43] (default settings)  
353 and PhageBoost [44] (default settings), with genomes being split and run individually before  
354 being concatenated back together, were run in succession on the chromosomal sequences  
355 to remove prophage sequences. All sequences were then uniformly fragmented to between  
356 1 kb and 15 kb, using a python script (available at [51]), to create artificial contigs. Each viral  
357 prediction tool was then run on the three sets of contigs (chromosome, plasmid, and phage)  
358 with default settings except for VIBRANT and VirSorter where the phage-derived contig set  
359 was additionally run using the virome mode, due to their improved performance in datasets  
360 consisting of mainly viral fragments [28, 45]. For tools where score/probability thresholds can  
361 be manually adjusted (DeepVirFinder, MetaPhinder, PPR Meta, Seeker and VirFinder), F1  
362 curves were plotted (100 data points) and optimal thresholds were determined by maximal  
363 F1 score.

### 364 **Benchmarking with mock community metagenomes**

365 Three shotgun metagenomic sequencing replicates of an uneven mock community [46] was  
366 retrieved from the European Nucleotide Archive (BioProject PRJEB19901). These  
367 communities contain five phage strains: the DNA viruses ES18 (H1), F0, M13, and P22  
368 (HT105), and the RNA virus F2. The quality of the data was checked using FASTQC (v11.8)  
369 [52] and overrepresented sequences were removed with Cutadapt (--max-n 0) (v2.10) [53].  
370 Cleaned paired-end reads were then assembled with MetaSPAdes (with default settings)  
371 (v3.14.1) [54] and contigs <1 kb were removed. Each tool was then run on the three sets of  
372 contigs using optimal parameters as determined previously. MetaQUAST (v5.0.2) [55] was  
373 used to map contigs to reference phage genomes and calculate coverage. Run time of each  
374 tool was recorded using a Linux virtual machine provided by Cloud Infrastructure for Big  
375 Data Microbial Bioinformatics (CLIMB-BIG-DATA), with the following configuration: CPU:  
376 Intel® Xeon® Processor E3-12xx v2 (8 VCPU); GPU: Cirrus Logic GD 5446; Memory: 64GB  
377 Multi-Bit ECC.

### 378 **Benchmarking with simulated mock virome communities**

379 Four mock communities (samples 2, 7, 9, and 13) containing between 500 and 1000 viral  
380 genomes created by Roux *et al.* were selected for analysis [47]. These samples belonged to  
381 four different beta diversity groups and did not share any of their 50 most abundant viruses.  
382 Each simulation of 10 million paired-end reads were quality controlled with Trimmomatic  
383 (v.0.38) [56] and assembled with MetaSPAdes by Roux *et al.* [47]. The contigs were then  
384 downloaded for benchmarking. As before, contigs with length <1 kbp were removed, and  
385 then inputted into each viral identification program. Positive viral contig sets for each tool  
386 were then extracted and reads were mapped to these with BMap [57] with ambiguous  
387 mapped reads assigned to contigs at random, as in Roux *et al.* [47]. Primary mapped reads  
388 with pairs mapping to the same contig (options -F 0x2 0x904) were then extracted with  
389 Samtools [58] and mapped to a pool of non-redundant population contigs. This pool was  
390 created by clustering all four samples with nucmer (v3.1) [59], at  $\geq 95\%$  ANI (average  
391 nucleotide identity) across  $\geq 80\%$  of their lengths. Abundance matrices for each tool were  
392 calculated by normalising read counts by contig length and total library size (counts per  
393 million) calculation commonly used in RNA-seq analyses. These abundance matrices were  
394 then used to calculate Shannon, Simpson, and Bray-Curtis dissimilarity indices using the  
395 vegan package [60]. Non-metric multidimensional scaling (NMDS) and analysis of similarity  
396 (ANOSIM) were also computed with vegan. ANOSIM  $p$ -values were corrected with the  
397 Benjamini–Hochberg method. Seed and permutations were set as 123 and 9999  
398 respectively, where possible. All plots were generated with ggplot2 [61] and arranged with  
399 ggarrange from ggpubr [62].

400 **List of Abbreviations**

401

402

403 ANI Average Nucleotide Identity

404 ANOSIM Analysis of Similarity

405 GPU Graphics Processing Unit

406 kb Kilobases

407 MDA Multiple Displacement Amplification

408 NCBI National Center for Biotechnology Information

409 NMDS Non-metric Multidimensional Scaling

410 RefSeq NCBI Reference Sequence Database

411 ssDNA Single-stranded DNA

412 VCPU Virtual Central Processing Unit

413

414

415 **Declarations**

416

417 **Ethics approval and consent to participate**

418 Not applicable

419

420 **Consent for publication**

421 Not applicable

422

423 **Availability of data and material**

424 All RefSeq genomes used in this study can be downloaded from NCBI -  
425 <https://www.ncbi.nlm.nih.gov/genome/>. Relevant accession numbers for virus and host  
426 genomes can be found in Additional file 6.

427 Sequencing data from other studies first described in other man are available as described  
428 in the relevant articles. Scripts and commands created for this study are available at our  
429 GitHub repository – [https://github.com/sxh1136/Phage\\_tools](https://github.com/sxh1136/Phage_tools).

430

431 **Competing interests**

432 The authors declare that they have no competing interests

433

434 **Funding**

435 SFSH was supported by the Wellcome Trust Antimicrobials and Antimicrobial Resistance  
436 Doctoral Training Programme (215154/Z/18/Z). ADM was supported by MRC  
437 (MR/T030062/1). WvS was supported by a Royal Society Wolfson Research Merit Award  
438 (WM160092) and BBSRC (BB/S017941/1).

439

440 **Authors' contributions**

441 The study was designed by all authors. SFSH analysed and interpreted the data generated  
442 in this study. All authors wrote and approved the manuscript.

443

444 **Acknowledgements**

445 We wish to thank the authors of Kleiner *et al.* [46] and Roux *et al.* [47] for making their  
446 sequencing data publicly available, allowing their use in this study.

447



448 **Tables**

449

| <b>Software</b>               | <b>Description</b>                                                                                                                                                                                                                                   | <b>Reference</b> |
|-------------------------------|------------------------------------------------------------------------------------------------------------------------------------------------------------------------------------------------------------------------------------------------------|------------------|
| DeepVirFinder                 | Predicts viral sequences via a k-mer based deep learning method using convolutional neural networks (CNN). Based on VirFinder.                                                                                                                       | [39]             |
| MARVEL                        | Machine learning tool for predicting phage sequences in metagenomic bins.                                                                                                                                                                            | [40]             |
| MetaPhinder                   | Integrates BLAST hits to multiple phage genomes in a database to identify phage sequences in assembled contigs.                                                                                                                                      | [35]             |
| metaviralSPAdes (ViralVerify) | Identifies viral sequences by leveraging metagenomic assembly graphs and analyzing the variations in depth of coverage between viral and bacterial genomes. Made of three modules, it also calculates the completeness of predicted viral sequences. | [42]             |
| <i>PhaMers</i>                | <i>Identifies phage sequences by a machine learning model based on k-mer frequencies.</i>                                                                                                                                                            | [63]             |
| PPR-Meta                      | Deep learning CNN approach to identify both phages and plasmids                                                                                                                                                                                      | [64]             |
| Seeker                        | Deep learning framework that uses Long Short-Term Memory models which does not depend on sequence motifs.                                                                                                                                            | [65]             |
| VIBRANT                       | Deep learning neural network based on protein signatures which also highlights auxiliary metabolic genes and pathways.                                                                                                                               | [45]             |
| <i>ViraMiner</i>              | <i>Extension of DeepVirFinder that is trained to identify any virus that may colonise human samples.</i>                                                                                                                                             | [66]             |
| VirFinder                     | K-mer based machine learning method for identification of viral contigs.                                                                                                                                                                             | [37]             |
| <i>virMine</i>                | <i>Iterative pipeline that relies on the abundance of non-viral sequences in databases to strictly filter out unwanted contigs. Pipeline accepts both reads or assembled contigs.</i>                                                                | [67]             |
| <i>VirMiner</i>               | <i>Web-based pipeline that handles genome assembly,</i>                                                                                                                                                                                              | [68]             |

|                    |                                                                                                                                                                                                                                                                |      |
|--------------------|----------------------------------------------------------------------------------------------------------------------------------------------------------------------------------------------------------------------------------------------------------------|------|
|                    | <i>functional annotation using a variety of databases and identification of phage contigs via a random forest algorithm</i>                                                                                                                                    |      |
| <i>VirNet</i>      | <i>Deep learning neural network using an attentional neural model trained on nucleotide viral fragments.</i>                                                                                                                                                   | [69] |
| <i>VIROME</i>      | <i>Web-based pipeline that classifies viral sequences based on homology to databases and functional annotates them. No local version.</i>                                                                                                                      | [34] |
| VirSorter          | Uses referenced-based and reference-free approaches in unison relying on probabilistic similarity models and referenced based protein homology searches to increase novel virus detection.                                                                     | [28] |
| VirSorter2         | Builds on VirSorter by applying machine learning to evaluate “viralness” using genomic features. Works with a wider variety of viral groups than its predecessor.                                                                                              | [70] |
| <i>VirusSeeker</i> | <i>Consists of two BLAST-based pipelines – Virome and Discovery. Virome aligns reads to a curated database to identify viral sequences and compute their abundance in the sample. Discovery focuses on contig-based analysis to aid novel virus discovery.</i> | [36] |

450 **Table 1. Overview of tools to identify and predict phage sequences in microbial**  
 451 **ecosystems.** Tools in italics were not included as they were either irrelevant to this study or  
 452 insurmountable technical difficulties were encountered during their use.

453

454

| Sequence group                           | Number of sequences | Number of artificial contigs |
|------------------------------------------|---------------------|------------------------------|
| Bacterial and archaeal chromosomes       | 719 (6,963)         | 326,595                      |
| Bacterial and archaeal plasmids          | 5,664               | 100,296                      |
| Bacteriophage and archaeal virus genomes | 1,039               | 8,411                        |

455 **Table 2. Sequences included in the RefSeq-based dataset.** Numbers in parenthesis  
456 indicate the number of sequences before random down sampling. All sequences were  
457 randomly fragmented into artificial contigs of lengths between 1 kb and 15 kb. Identities of  
458 the included sequences are provided in Additional file 6.

459

## 460 **Figure legends**

461

### 462 **Figure 1: Comparison of viral identification tools on artificial RefSeq contigs.**

463 Contigs were generated by randomly fragmenting complete bacterial/archaeal/phage  
464 genomes and plasmids deposited in the NCBI Reference Sequence Database (RefSeq)  
465 between 1 January 2018 and 2 July 2020, to a uniform distribution. Each tool was then  
466 separately run on the true positive (phage genome fragments) and negative  
467 (bacterial/archaeal chromosome and plasmid fragments) datasets. For tools which  
468 score/probability threshold or categories could be manually adjusted, values/categories were  
469 selected based on optimal F1-scores. As MARVEL accepts bins as input, each contig was  
470 treated as a separate bin.

471

### 472 **Figure 2: Comparison of viral identification tools on uneven mock community 473 samples**

474 Mock community reads were retrieved from a previous study [46]. and assembled with  
475 metaSPAdes before running each identification tool using optimal thresholds based on  
476 previous benchmarks. F1-score, Precision, and Recall metrics are displayed as separate  
477 panels. Each sample is plotted as a single point for each tool, with a boxplot indicating the  
478 interquartile ranges, extremes and mean of all three samples. Where no contigs were  
479 identified as viral by the tool, precision was set as zero.

480

### 481 **Figure 3: Comparison of tool runtimes on uneven mock community samples**

482 Wall runtime of each tool on mock community samples was recorded on an 8 VCPU, 64GB  
483 RAM, Linux high performance cluster without GPU acceleration. Each assembly contains  
484 ~50 million bp. For MARVEL, the lower bar indicates wall time of the prediction tool itself,  
485 and the top bar indicates the wall time for binning each sample.

486

### 487 **Figure 4: Estimation of diversity metrics of tool predicted virome populations.**

488 To assess the impact of each tool on population diversity, four simulated virome assemblies  
489 from Roux *et al.*[47] were downloaded. Each program was then run to determine the subset  
490 of predicted viral contigs. Reads were mapped to these contig subsets and mapped reads  
491 were then subsequently mapped to a pool of population contigs. All diversity metrics were  
492 computed by the R package “vegan” [60]. ‘Default’ in each plot indicates each sample’s

493 original assembly. A. Number of genomes observed from read mapping to predicted viral  
494 contig populations for each tool. B. Comparison of estimated Shannon diversity indices from  
495 each tool's virome subset. Estimations are based on read counts that were normalised by  
496 contig size and sequencing depth of the virome. C. Comparison of Simpson diversity indices  
497 from each tool's virome subset. D. Non-metric multidimensional scaling (NMDS) ordination  
498 plot of Bray-Curtis dissimilarity of virome subsets predicted by each viral identification tool.  
499 Ellipses indicate the 95% confidence interval for each sample cluster's centroid. Samples  
500 are represented by the same symbol and ellipse line type; tools are denoted by colour.

501

502

503

504

## 505 **References**

- 506 1. Parikka KJ, Romancer ML, Wauters N, Jacquet S. Deciphering the virus-to-prokaryote  
507 ratio (VPR): insights into virus–host relationships in a variety of ecosystems. *Biol Rev.*  
508 2017;92:1081–100.
- 509 2. Cobián Güemes AG, Youle M, Cantú VA, Felts B, Nulton J, Rohwer F. Viruses as  
510 Winners in the Game of Life. *Annu Rev Virol.* 2016;3:197–214.
- 511 3. Hoyles L, McCartney AL, Neve H, Gibson GR, Sanderson JD, Heller KJ, et al.  
512 Characterization of virus-like particles associated with the human faecal and caecal  
513 microbiota. *Res Microbiol.* 2014;165:803–12.
- 514 4. Silveira CB, Rohwer FL. Piggyback-the-Winner in host-associated microbial communities.  
515 *Npj Biofilms Microbiomes.* 2016;2:1–5.
- 516 5. Emerson JB, Roux S, Brum JR, Bolduc B, Woodcroft BJ, Jang HB, et al. Host-linked soil  
517 viral ecology along a permafrost thaw gradient. *Nat Microbiol.* 2018;3:870–80.
- 518 6. Jiao N, Herndl GJ, Hansell DA, Benner R, Kattner G, Wilhelm SW, et al. Microbial  
519 production of recalcitrant dissolved organic matter: long-term carbon storage in the global  
520 ocean. *Nat Rev Microbiol.* 2010;8:593–9.
- 521 7. Rohwer F, Thurber RV. Viruses manipulate the marine environment. *Nature.*  
522 2009;459:207–12.
- 523 8. Brown-Jaque M, Calero-Cáceres W, Muniesa M. Transfer of antibiotic-resistance genes  
524 via phage-related mobile elements. *Plasmid.* 2015;79:1–7.
- 525 9. Chiang YN, Penadés JR, Chen J. Genetic transduction by phages and chromosomal  
526 islands: The new and noncanonical. *PLoS Pathog.* 2019;15.  
527 doi:10.1371/journal.ppat.1007878.
- 528 10. McInnes RS, McCallum GE, Lamberte LE, van Schaik W. Horizontal transfer of antibiotic  
529 resistance genes in the human gut microbiome. *Curr Opin Microbiol.* 2020;53:35–43.
- 530 11. Sutton TDS, Hill C. Gut Bacteriophage: Current Understanding and Challenges. *Front*  
531 *Endocrinol.* 2019;10. doi:10.3389/fendo.2019.00784.
- 532 12. Campbell A. The future of bacteriophage biology. *Nat Rev Genet.* 2003;4:471–7.
- 533 13. Hobbs Z, Abedon ST. Diversity of phage infection types and associated terminology: the  
534 problem with ‘Lytic or lysogenic.’ *FEMS Microbiol Lett.* 2016;363.  
535 doi:10.1093/femsle/fnw047.
- 536 14. Walker AW, Duncan SH, Louis P, Flint HJ. Phylogeny, culturing, and metagenomics of  
537 the human gut microbiota. *Trends Microbiol.* 2014;22:267–74.
- 538 15. Loman NJ, Constantinidou C, Christner M, Rohde H, Chan JZ-M, Quick J, et al. A  
539 Culture-Independent Sequence-Based Metagenomics Approach to the Investigation of an  
540 Outbreak of Shiga-Toxigenic *Escherichia coli* O104:H4. *JAMA.* 2013;309:1502–10.
- 541 16. Lwoff A. Lysogeny. *Bacteriol Rev.* 1953;17:269–337.

- 542 17. Labonté JM, Swan BK, Poulos B, Luo H, Koren S, Hallam SJ, et al. Single-cell  
543 genomics-based analysis of virus–host interactions in marine surface bacterioplankton.  
544 ISME J. 2015;9:2386–99.
- 545 18. Cenens W, Makumi A, Mebrhatu MT, Lavigne R, Aertsen A. Phage–host interactions  
546 during pseudolysogeny. *Bacteriophage*. 2013;3. doi:10.4161/bact.25029.
- 547 19. Ripp S, Miller RV. The role of pseudolysogeny in bacteriophage-host interactions in a  
548 natural freshwater environment. *Microbiology*,. 1997;143:2065–70.
- 549 20. Shkoporov AN, Khokhlova EV, Fitzgerald CB, Stockdale SR, Draper LA, Ross RP, et al.  
550 ΦCrAss001 represents the most abundant bacteriophage family in the human gut and  
551 infects *Bacteroides intestinalis*. *Nat Commun*. 2018;9:1–8.
- 552 21. Ackermann HW, Audurier A, Berthiaume L, Jones LA, Mayo JA, Vidaver AK. Guidelines  
553 for bacteriophage characterization. *Adv Virus Res*. 1978;23:1–24.
- 554 22. Thurber RV, Haynes M, Breitbart M, Wegley L, Rohwer F. Laboratory procedures to  
555 generate viral metagenomes. *Nat Protoc*. 2009;4:470–83.
- 556 23. Probst AJ, Weinmaier T, DeSantis TZ, Domingo JWS, Ashbolt N. New Perspectives on  
557 Microbial Community Distortion after Whole-Genome Amplification. *PLOS ONE*.  
558 2015;10:e0124158.
- 559 24. Yilmaz S, Allgaier M, Hugenholtz P. Multiple displacement amplification compromises  
560 quantitative analysis of metagenomes. *Nat Methods*. 2010;7:943–4.
- 561 25. Kim M-S, Bae J-W. Lysogeny is prevalent and widely distributed in the murine gut  
562 microbiota. *ISME J*. 2018;12:1127–41.
- 563 26. Roux S, Krupovic M, Debroas D, Forterre P, Enault F. Assessment of viral community  
564 functional potential from viral metagenomes may be hampered by contamination with cellular  
565 sequences. *Open Biol*. 2013;3:130160.
- 566 27. Kim M-S, Bae J-W. Lysogeny is prevalent and widely distributed in the murine gut  
567 microbiota. *ISME J*. 2018;12:1127–41.
- 568 28. Roux S, Enault F, Hurwitz BL, Sullivan MB. VirSorter: mining viral signal from microbial  
569 genomic data. *PeerJ*. 2015;3:e985.
- 570 29. Akhter S, Aziz RK, Edwards RA. PhiSpy: a novel algorithm for finding prophages in  
571 bacterial genomes that combines similarity- and composition-based strategies. *Nucleic Acids*  
572 *Res*. 2012;40:e126.
- 573 30. Fouts DE. Phage\_Finder: Automated identification and classification of prophage regions  
574 in complete bacterial genome sequences. *Nucleic Acids Res*. 2006;34:5839–51.
- 575 31. Arndt D, Marcu A, Liang Y, Wishart DS. PHAST, PHASTER and PHASTEST: Tools for  
576 finding prophage in bacterial genomes. *Brief Bioinform*. 2017;20:1560–7.
- 577 32. Lima-Mendez G, Van Helden J, Toussaint A, Leplae R. Prophinder: a computational tool  
578 for prophage prediction in prokaryotic genomes. *Bioinforma Oxf Engl*. 2008;24:863–5.
- 579 33. Roux S, Tournayre J, Mahul A, Debroas D, Enault F. Metavir 2: new tools for viral  
580 metagenome comparison and assembled virome analysis. *BMC Bioinformatics*. 2014;15:76.

- 581 34. Wommack KE, Bhavsar J, Polson SW, Chen J, Dumas M, Srinivasiah S, et al. VIROME:  
582 a standard operating procedure for analysis of viral metagenome sequences. *Stand*  
583 *Genomic Sci.* 2012;6:427–39.
- 584 35. Jurtz VI, Villarroel J, Lund O, Voldby Larsen M, Nielsen M. MetaPhinder—Identifying  
585 Bacteriophage Sequences in Metagenomic Data Sets. *PLoS ONE.* 2016;11.  
586 doi:10.1371/journal.pone.0163111.
- 587 36. Zhao G, Wu G, Lim ES, Droit L, Krishnamurthy S, Barouch DH, et al. VirusSeeker, a  
588 computational pipeline for virus discovery and virome composition analysis. *Virology.*  
589 2017;503:21–30.
- 590 37. Ren J, Ahlgren NA, Lu YY, Fuhrman JA, Sun F. VirFinder: a novel k-mer based tool for  
591 identifying viral sequences from assembled metagenomic data. *Microbiome.* 2017;5:69.
- 592 38. Ponsero AJ, Hurwitz BL. The Promises and Pitfalls of Machine Learning for Detecting  
593 Viruses in Aquatic Metagenomes. *Front Microbiol.* 2019;10. doi:10.3389/fmicb.2019.00806.
- 594 39. Ren J, Song K, Deng C, Ahlgren NA, Fuhrman JA, Li Y, et al. Identifying viruses from  
595 metagenomic data using deep learning. *Quant Biol.* 2020;8:64–77.
- 596 40. Amgarten D, Braga LPP, da Silva AM, Setubal JC. MARVEL, a Tool for Prediction of  
597 Bacteriophage Sequences in Metagenomic Bins. *Front Genet.* 2018;9.  
598 doi:10.3389/fgene.2018.00304.
- 599 41. Grazziotin AL, Koonin EV, Kristensen DM. Prokaryotic Virus Orthologous Groups  
600 (pVOGs): a resource for comparative genomics and protein family annotation. *Nucleic Acids*  
601 *Res.* 2017;45 Database issue:D491–8.
- 602 42. Antipov D, Raiko M, Lapidus A, Pevzner PA. MetaviralSPAdes: assembly of viruses from  
603 metagenomic data. *Bioinformatics.* 2020;36:4126–9.
- 604 43. Starikova EV, Tikhonova PO, Prianichnikov NA, Rands CM, Zdobnov EM, Iliina EN, et al.  
605 Phigaro: high throughput prophage sequence annotation. *Bioinformatics.* 2020.  
606 doi:10.1093/bioinformatics/btaa250.
- 607 44. Sirén K, Millard A, Petersen B, Gilbert MTP, Clokie MRJ, Sicheritz-Pontén T. Rapid  
608 discovery of novel prophages using biological feature engineering and machine learning.  
609 *NAR Genomics Bioinforma.* 2021;3. doi:10.1093/nargab/lqaa109.
- 610 45. Kieft K, Zhou Z, Anantharaman K. VIBRANT: automated recovery, annotation and  
611 curation of microbial viruses, and evaluation of viral community function from genomic  
612 sequences. *Microbiome.* 2020;8:90.
- 613 46. Kleiner M, Thorson E, Sharp CE, Dong X, Liu D, Li C, et al. Assessing species biomass  
614 contributions in microbial communities via metaproteomics. *Nat Commun.* 2017;8.  
615 doi:10.1038/s41467-017-01544-x.
- 616 47. Roux S, Emerson JB, Eloë-Fadrosh EA, Sullivan MB. Benchmarking viromics: an in  
617 silico evaluation of metagenome-enabled estimates of viral community composition and  
618 diversity. *PeerJ.* 2017;5:e3817.
- 619 48. Marquet M, Hölzer M, Pletz MW, Viehweger A, Makarewicz O, Ehrlich R, et al. What the  
620 Phage: A scalable workflow for the identification and analysis of phage sequences. *bioRxiv.*  
621 2020;:2020.07.24.219899.



- 622 49. Na O, Mw W, Jr B, S C, D H, R M, et al. Reference sequence (RefSeq) database at  
623 NCBI: current status, taxonomic expansion, and functional annotation. *Nucleic acids*  
624 *research*. 2016;44. doi:10.1093/nar/gkv1189.
- 625 50. Bushnell B. BBMap. 2020. <https://sourceforge.net/projects/bbmap/>.
- 626 51. Ho SFS. Benchmarking phage prediction tool GitHub repository. 2021.  
627 [https://github.com/sxh1136/Phage\\_tools](https://github.com/sxh1136/Phage_tools).
- 628 52. Andrews S, Krueger F, Segonds-Pichon A, Biggins L, Krueger C, Wingett S. FastQC.  
629 2019.
- 630 53. Martin M. Cutadapt removes adapter sequences from high-throughput sequencing  
631 reads. *EMBnet.journal*. 2011;17:10–2.
- 632 54. Nurk S, Meleshko D, Korobeynikov A, Pevzner PA. metaSPAdes: a new versatile  
633 metagenomic assembler. *Genome Res*. 2017;27:824–34.
- 634 55. Mikheenko A, Saveliev V, Gurevich A. MetaQUAST: evaluation of metagenome  
635 assemblies. *Bioinforma Oxf Engl*. 2016;32:1088–90.
- 636 56. Bolger AM, Lohse M, Usadel B. Trimmomatic: a flexible trimmer for Illumina sequence  
637 data. *Bioinformatics*. 2014;30:2114–20.
- 638 57. Bushnell B. BBMap: A Fast, Accurate, Splice-Aware Aligner. 2014.  
639 <https://www.osti.gov/biblio/1241166>.
- 640 58. Li H, Handsaker B, Wysoker A, Fennell T, Ruan J, Homer N, et al. The Sequence  
641 Alignment/Map format and SAMtools. *Bioinformatics*. 2009;25:2078–9.
- 642 59. Marçais G, Delcher AL, Phillippy AM, Coston R, Salzberg SL, Zimin A. MUMmer4: A fast  
643 and versatile genome alignment system. *PLOS Comput Biol*. 2018;14:e1005944.
- 644 60. Oksanen J, Blanchet FG, Friendly M, Kindt R, Legendre P, McGlenn D, et al. vegan:  
645 Community Ecology Package. 2020. <https://CRAN.R-project.org/package=vegan>. Accessed  
646 1 Feb 2021.
- 647 61. Wickham H. ggplot2: Elegant Graphics for Data Analysis. Springer-Verlag New York;  
648 2016. <https://ggplot2.tidyverse.org>.
- 649 62. Kassambara A. ggpubr: “ggplot2” Based Publication Ready Plots. 2020. [https://CRAN.R-](https://CRAN.R-project.org/package=ggpubr)  
650 [project.org/package=ggpubr](https://CRAN.R-project.org/package=ggpubr).
- 651 63. Deaton J, Yu FB, Quake SR. PhaMers identifies novel bacteriophage sequences from  
652 thermophilic hot springs. *bioRxiv*. 2017;:169672.
- 653 64. Fang Z, Tan J, Wu S, Li M, Xu C, Xie Z, et al. PPR-Meta: a tool for identifying phages  
654 and plasmids from metagenomic fragments using deep learning. *GigaScience*. 2019;8.  
655 doi:10.1093/gigascience/giz066.
- 656 65. Auslander N, Gussow AB, Benler S, Wolf YI, Koonin EV. Seeker: alignment-free  
657 identification of bacteriophage genomes by deep learning. *Nucleic Acids Res*.  
658 2020;48:e121–e121.

- 659 66. Tampuu A, Bzhalava Z, Dillner J, Vicente R. ViraMiner: Deep learning on raw DNA  
660 sequences for identifying viral genomes in human samples. PLoS ONE. 2019;14.  
661 doi:10.1371/journal.pone.0222271.
- 662 67. Garretto A, Hatzopoulos T, Putonti C. virMine: automated detection of viral sequences  
663 from complex metagenomic samples. PeerJ. 2019;7:e6695.
- 664 68. Zheng T, Li J, Ni Y, Kang K, Misiakou M-A, Imamovic L, et al. Mining, analyzing, and  
665 integrating viral signals from metagenomic data. Microbiome. 2019;7. doi:10.1186/s40168-  
666 019-0657-y.
- 667 69. Abdelkareem AO, Khalil MI, Elaraby M, Abbas H, Elbehery AHA. VirNet: Deep attention  
668 model for viral reads identification. 2018 13th Int Conf Comput Eng Syst ICCES. 2018;:623–  
669 6.
- 670 70. Guo J, Bolduc B, Zayed AA, Varsani A, Dominguez-Huerta G, Delmont TO, et al.  
671 VirSorter2: a multi-classifier, expert-guided approach to detect diverse DNA and RNA  
672 viruses. Microbiome. 2021;9:37.

673

bioRxiv preprint doi: <https://doi.org/10.1101/2021.04.12.438782>; this version posted April 12, 2021. The copyright holder for this preprint (which was not certified by peer review) is the author/funder, who has granted bioRxiv a license to display the preprint in perpetuity. It is made available under aCC-BY-NC 4.0 International license.

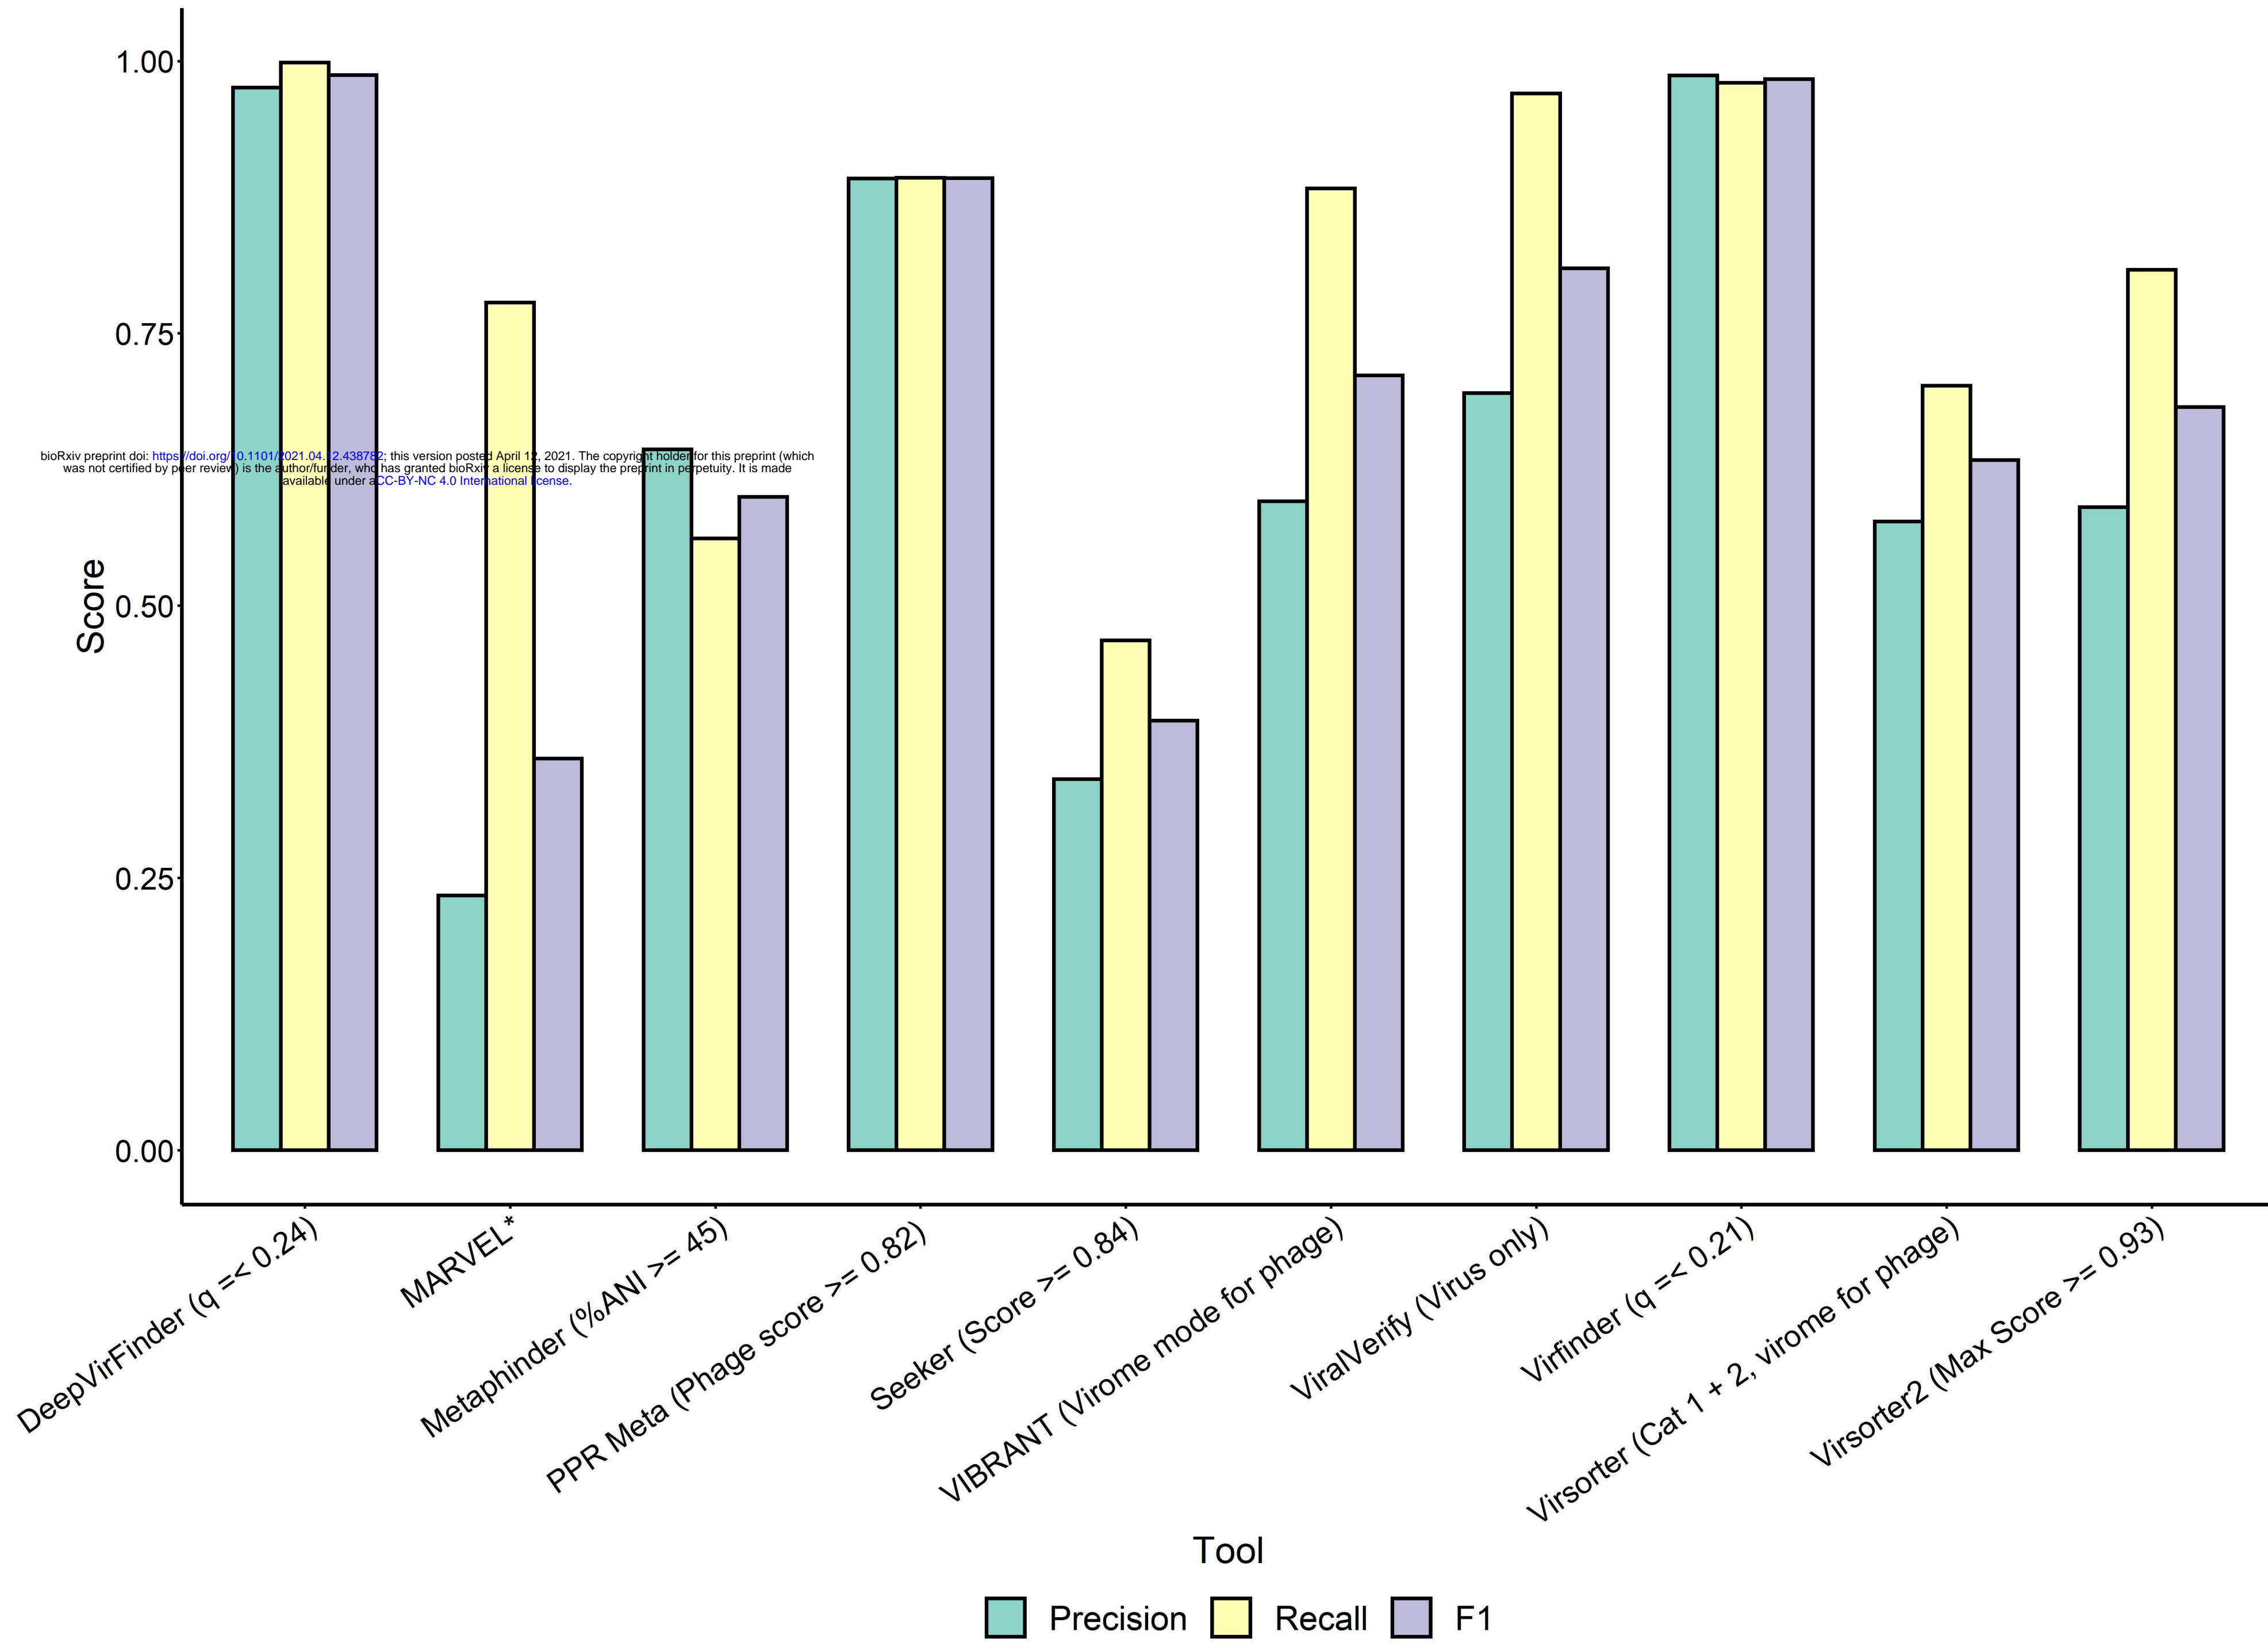

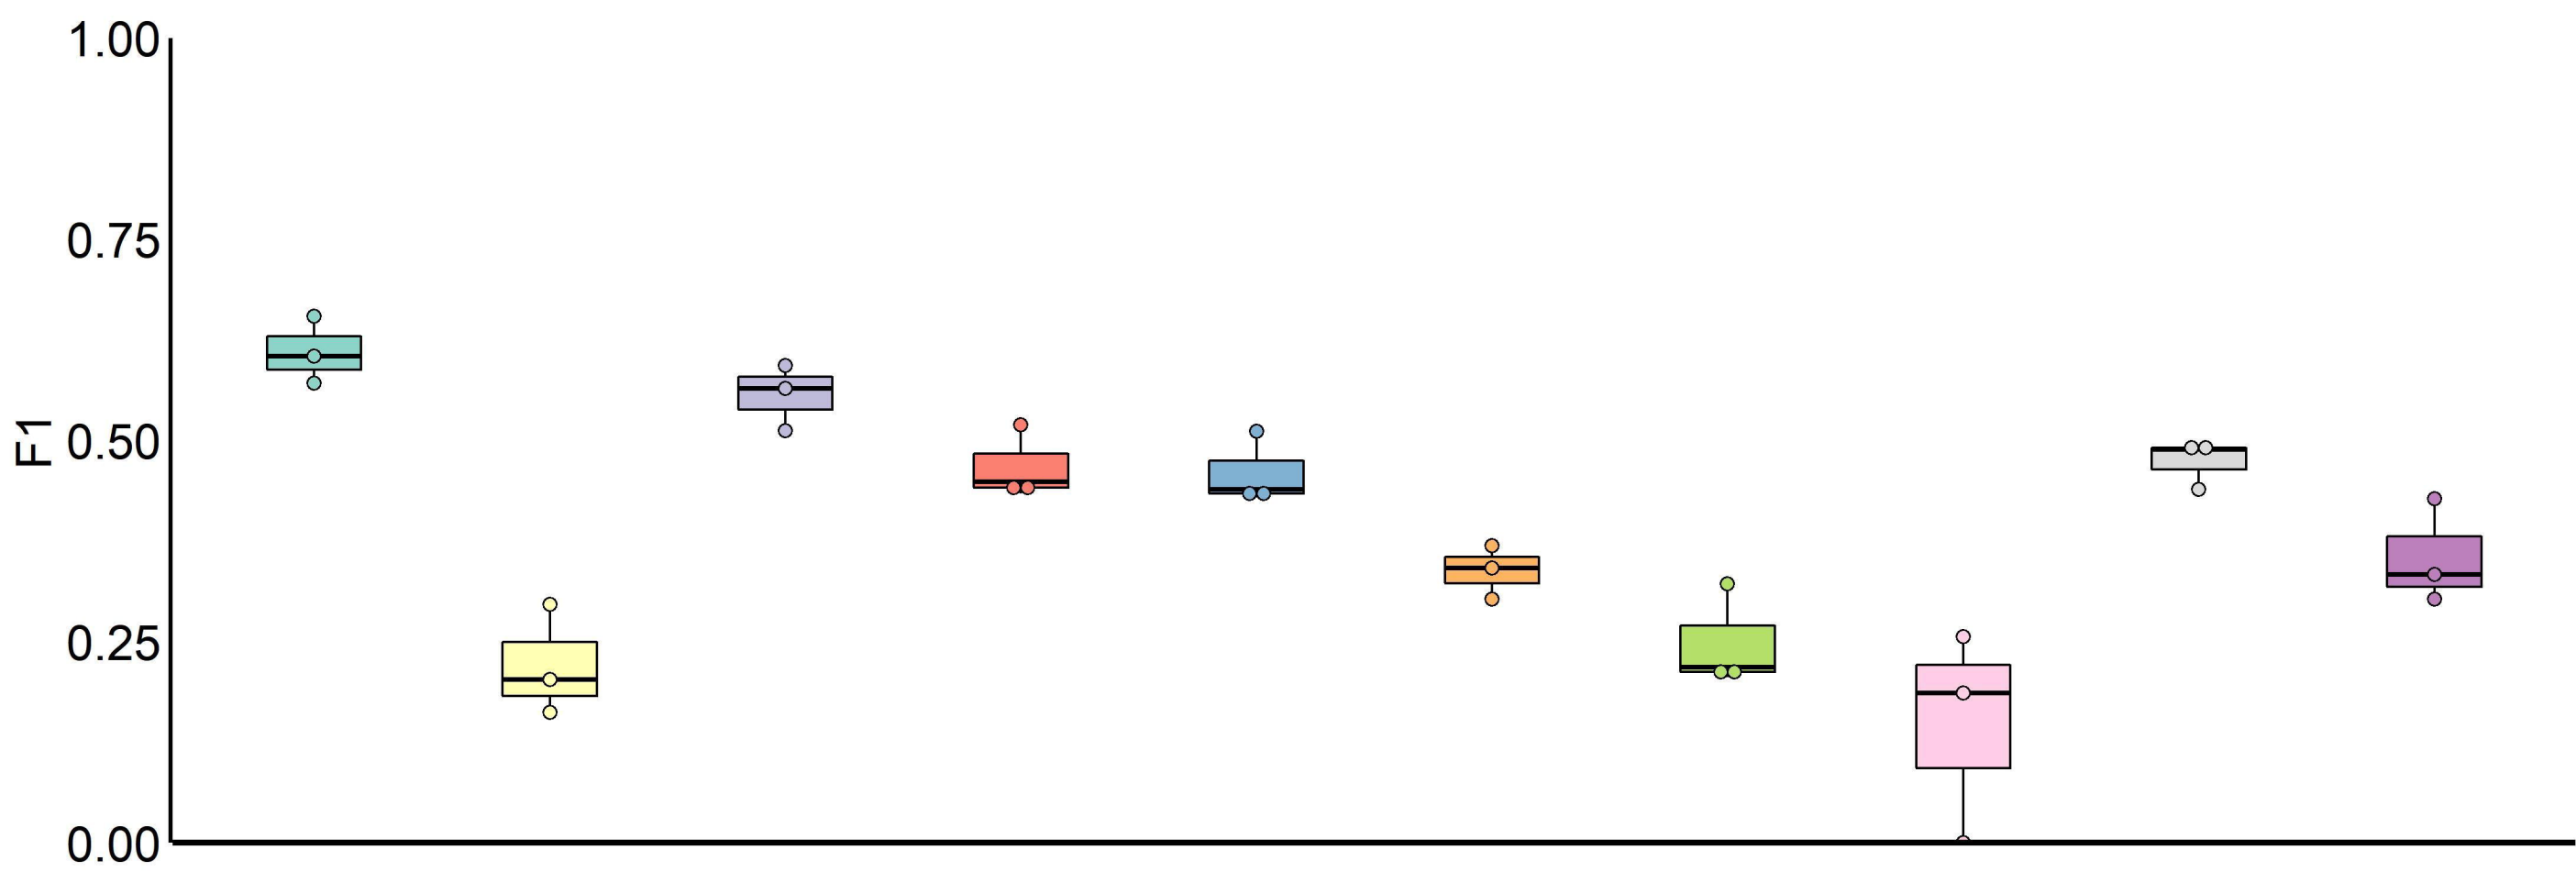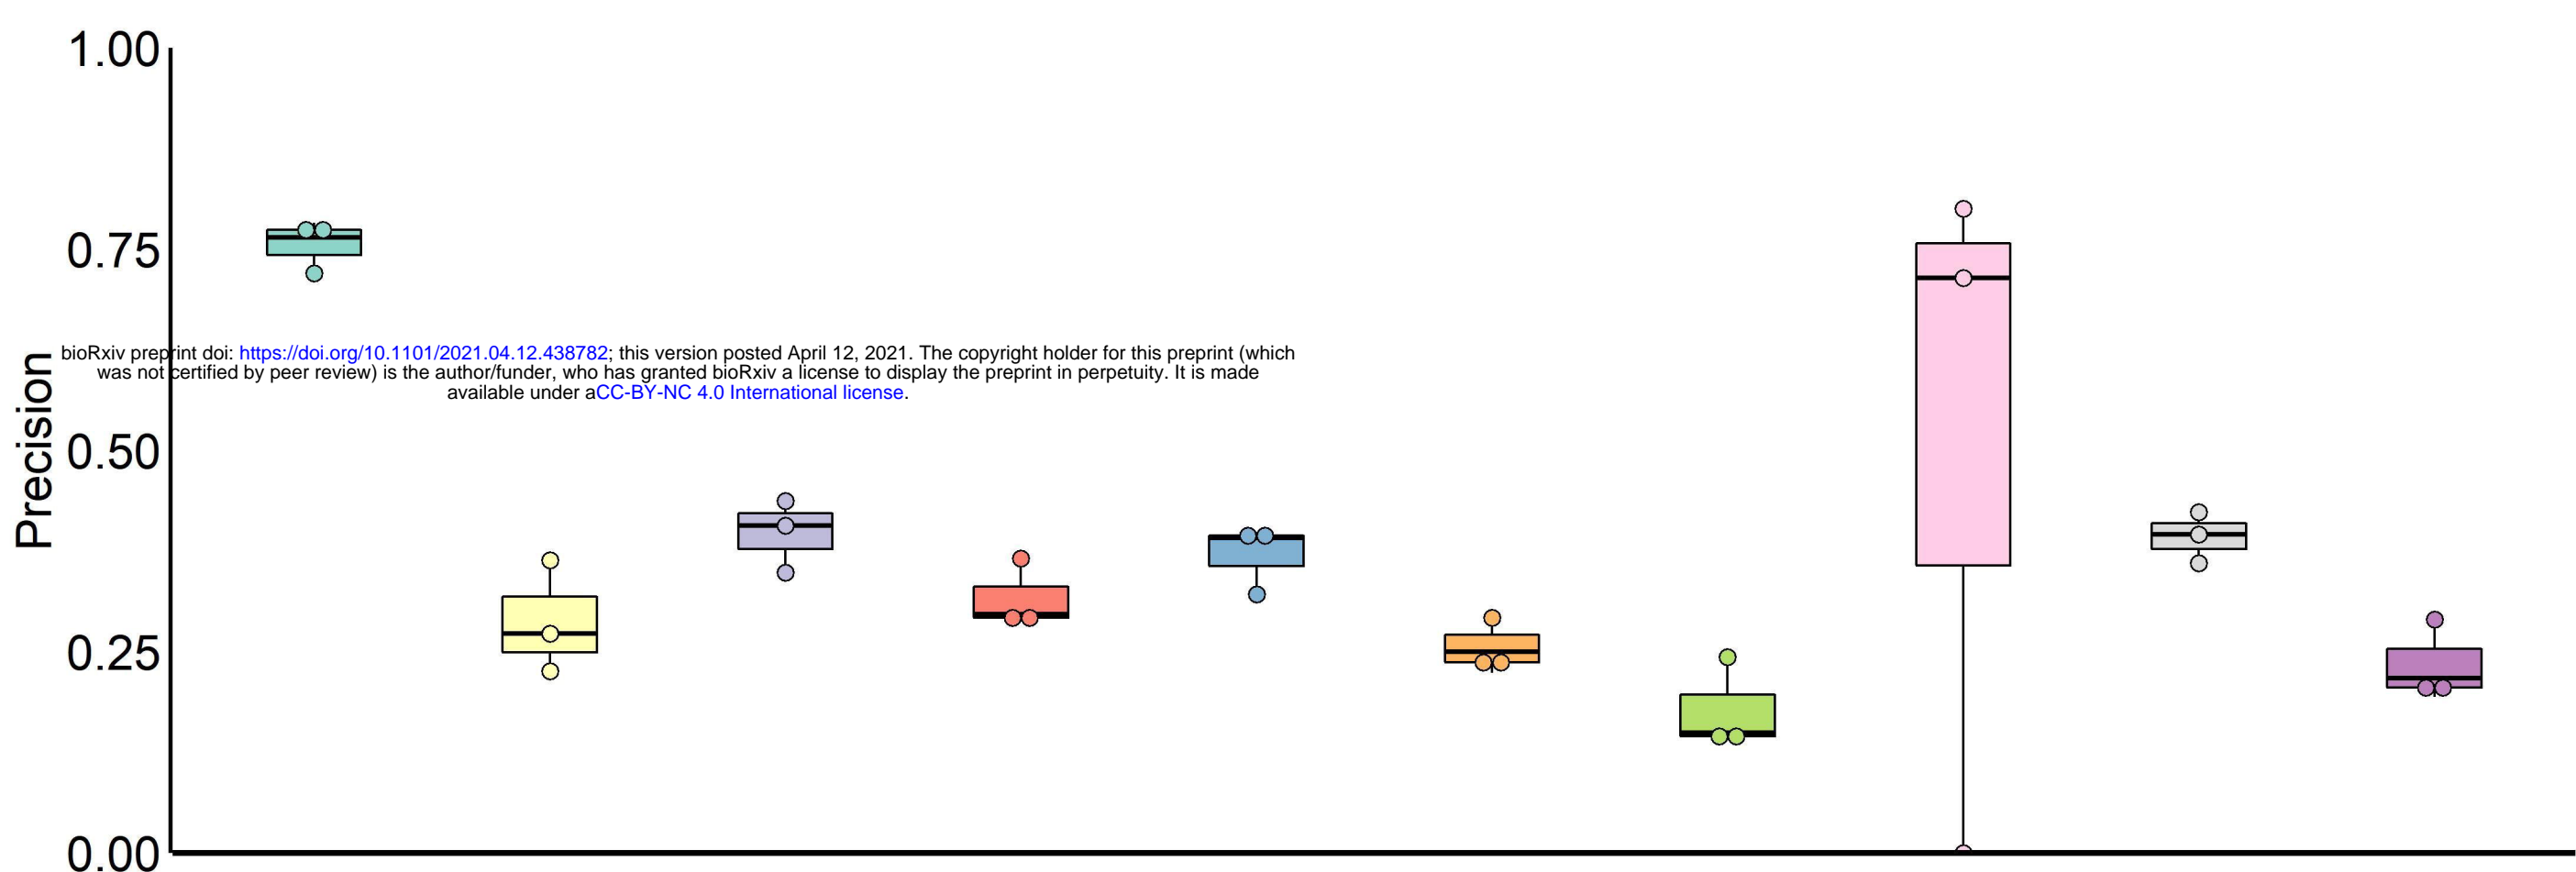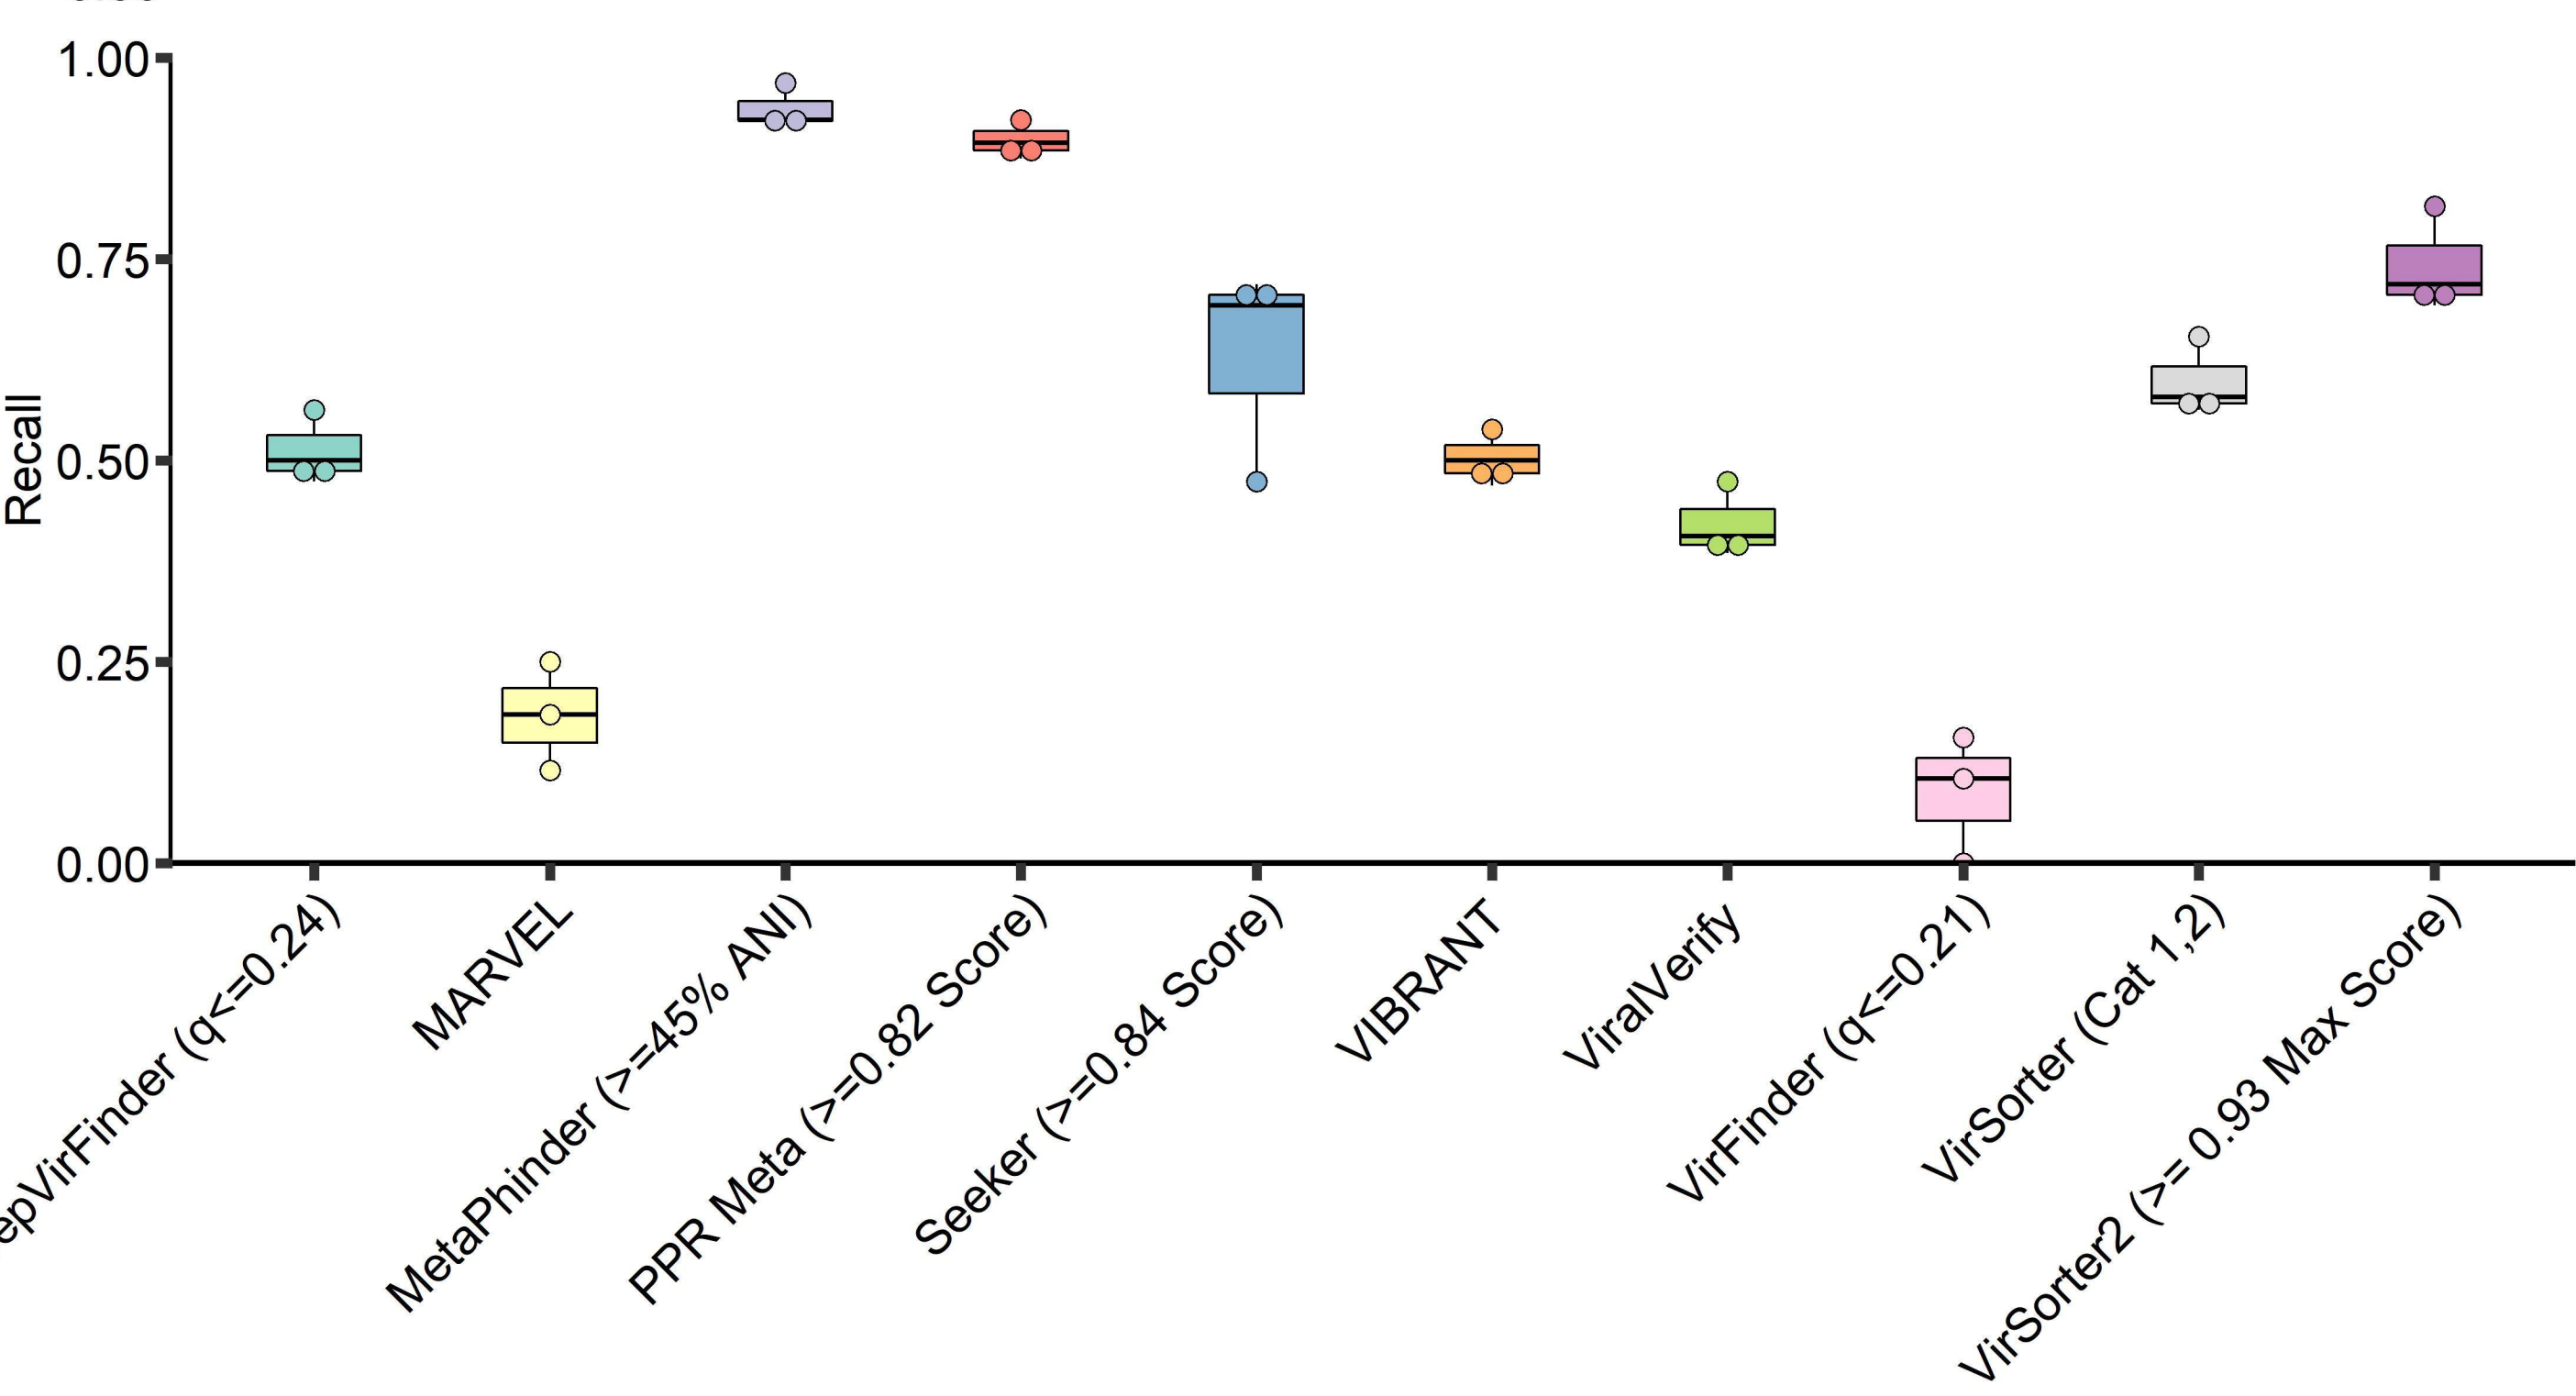

bioRxiv preprint doi: <https://doi.org/10.1101/2021.04.12.438782>; this version posted April 12, 2021. The copyright holder for this preprint (which was not certified by peer review) is the author/funder, who has granted bioRxiv a license to display the preprint in perpetuity. It is made available under aCC-BY-NC 4.0 International license.

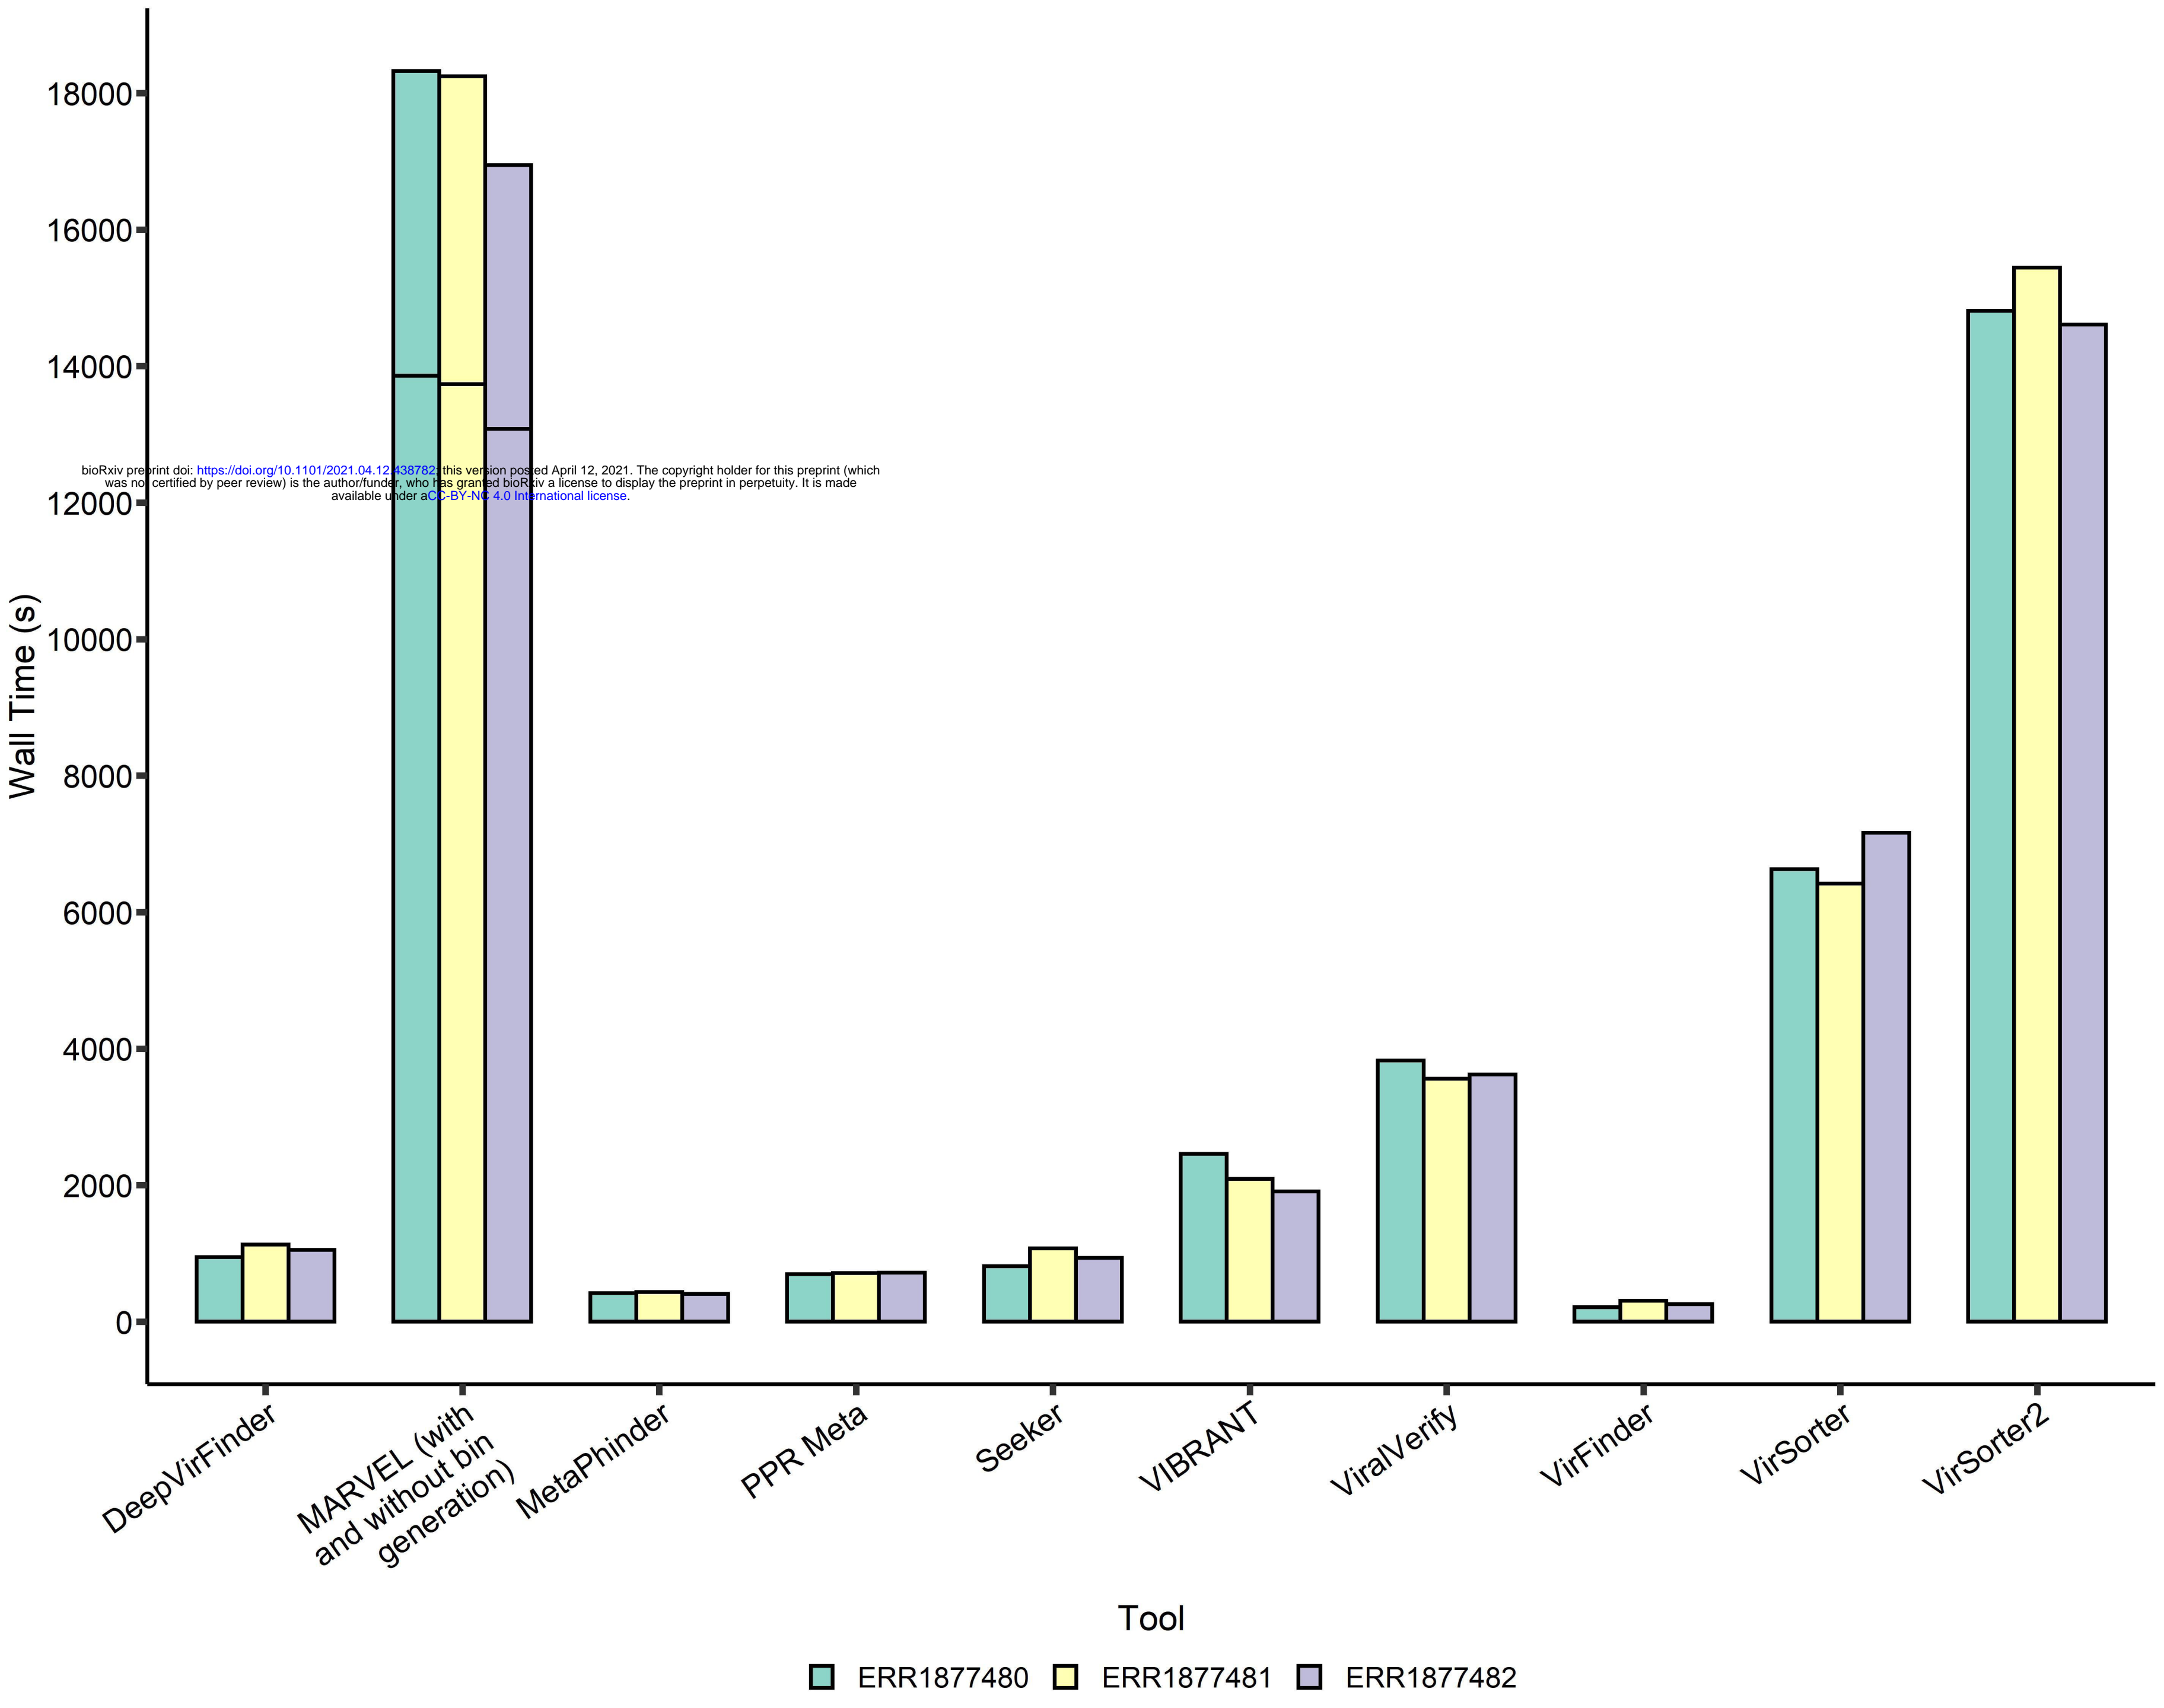

**A**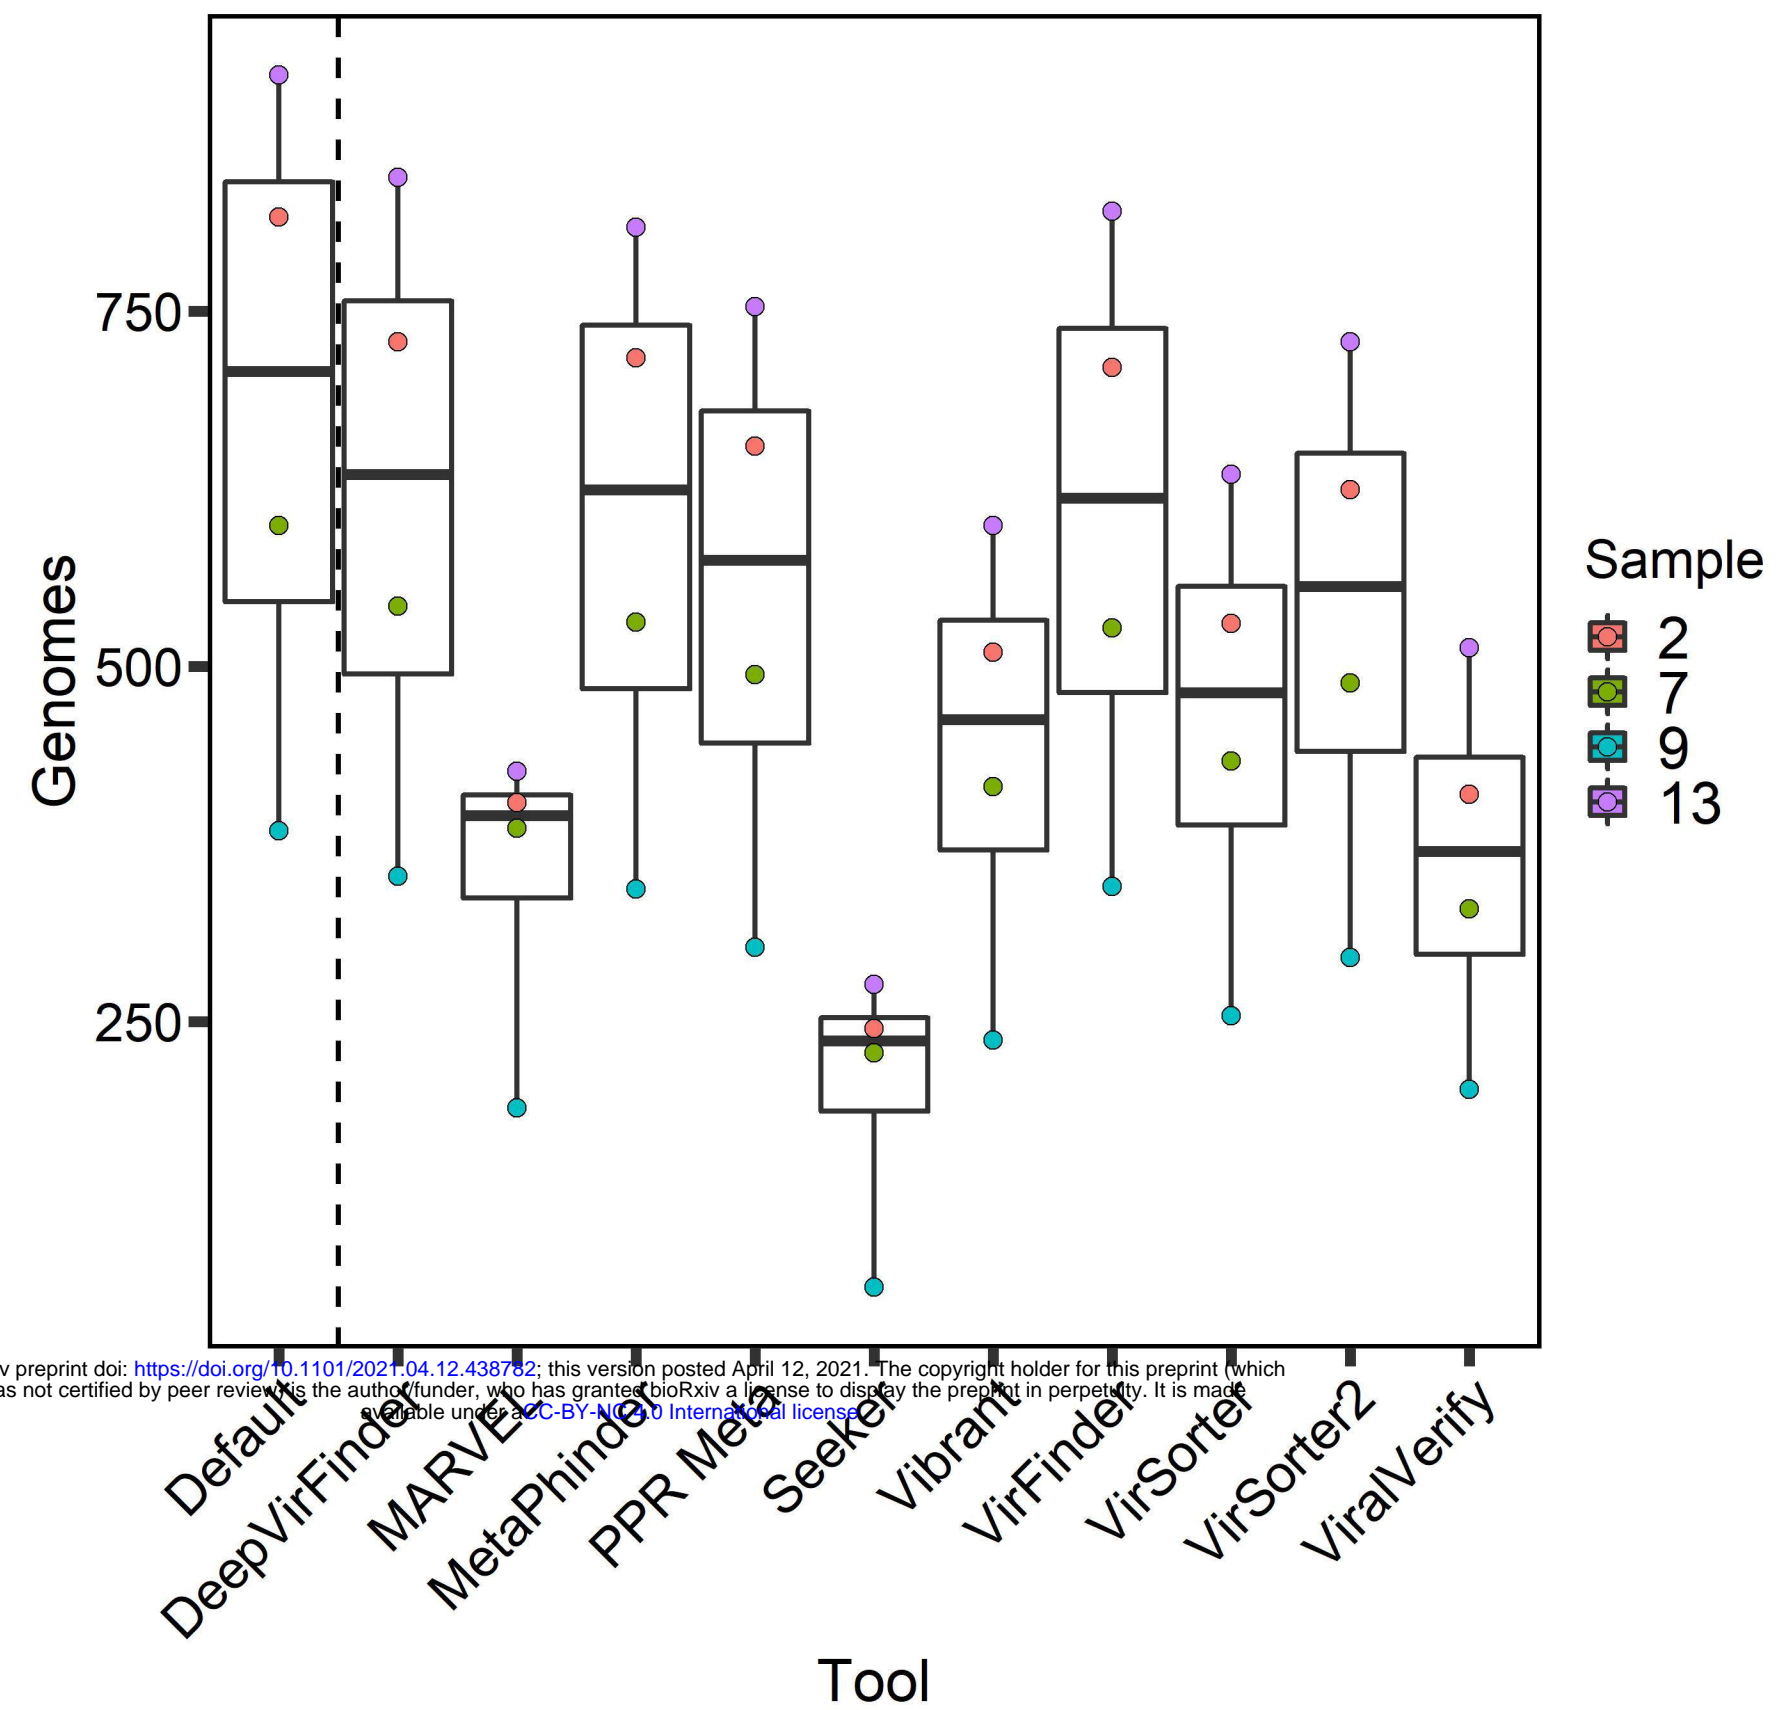**B**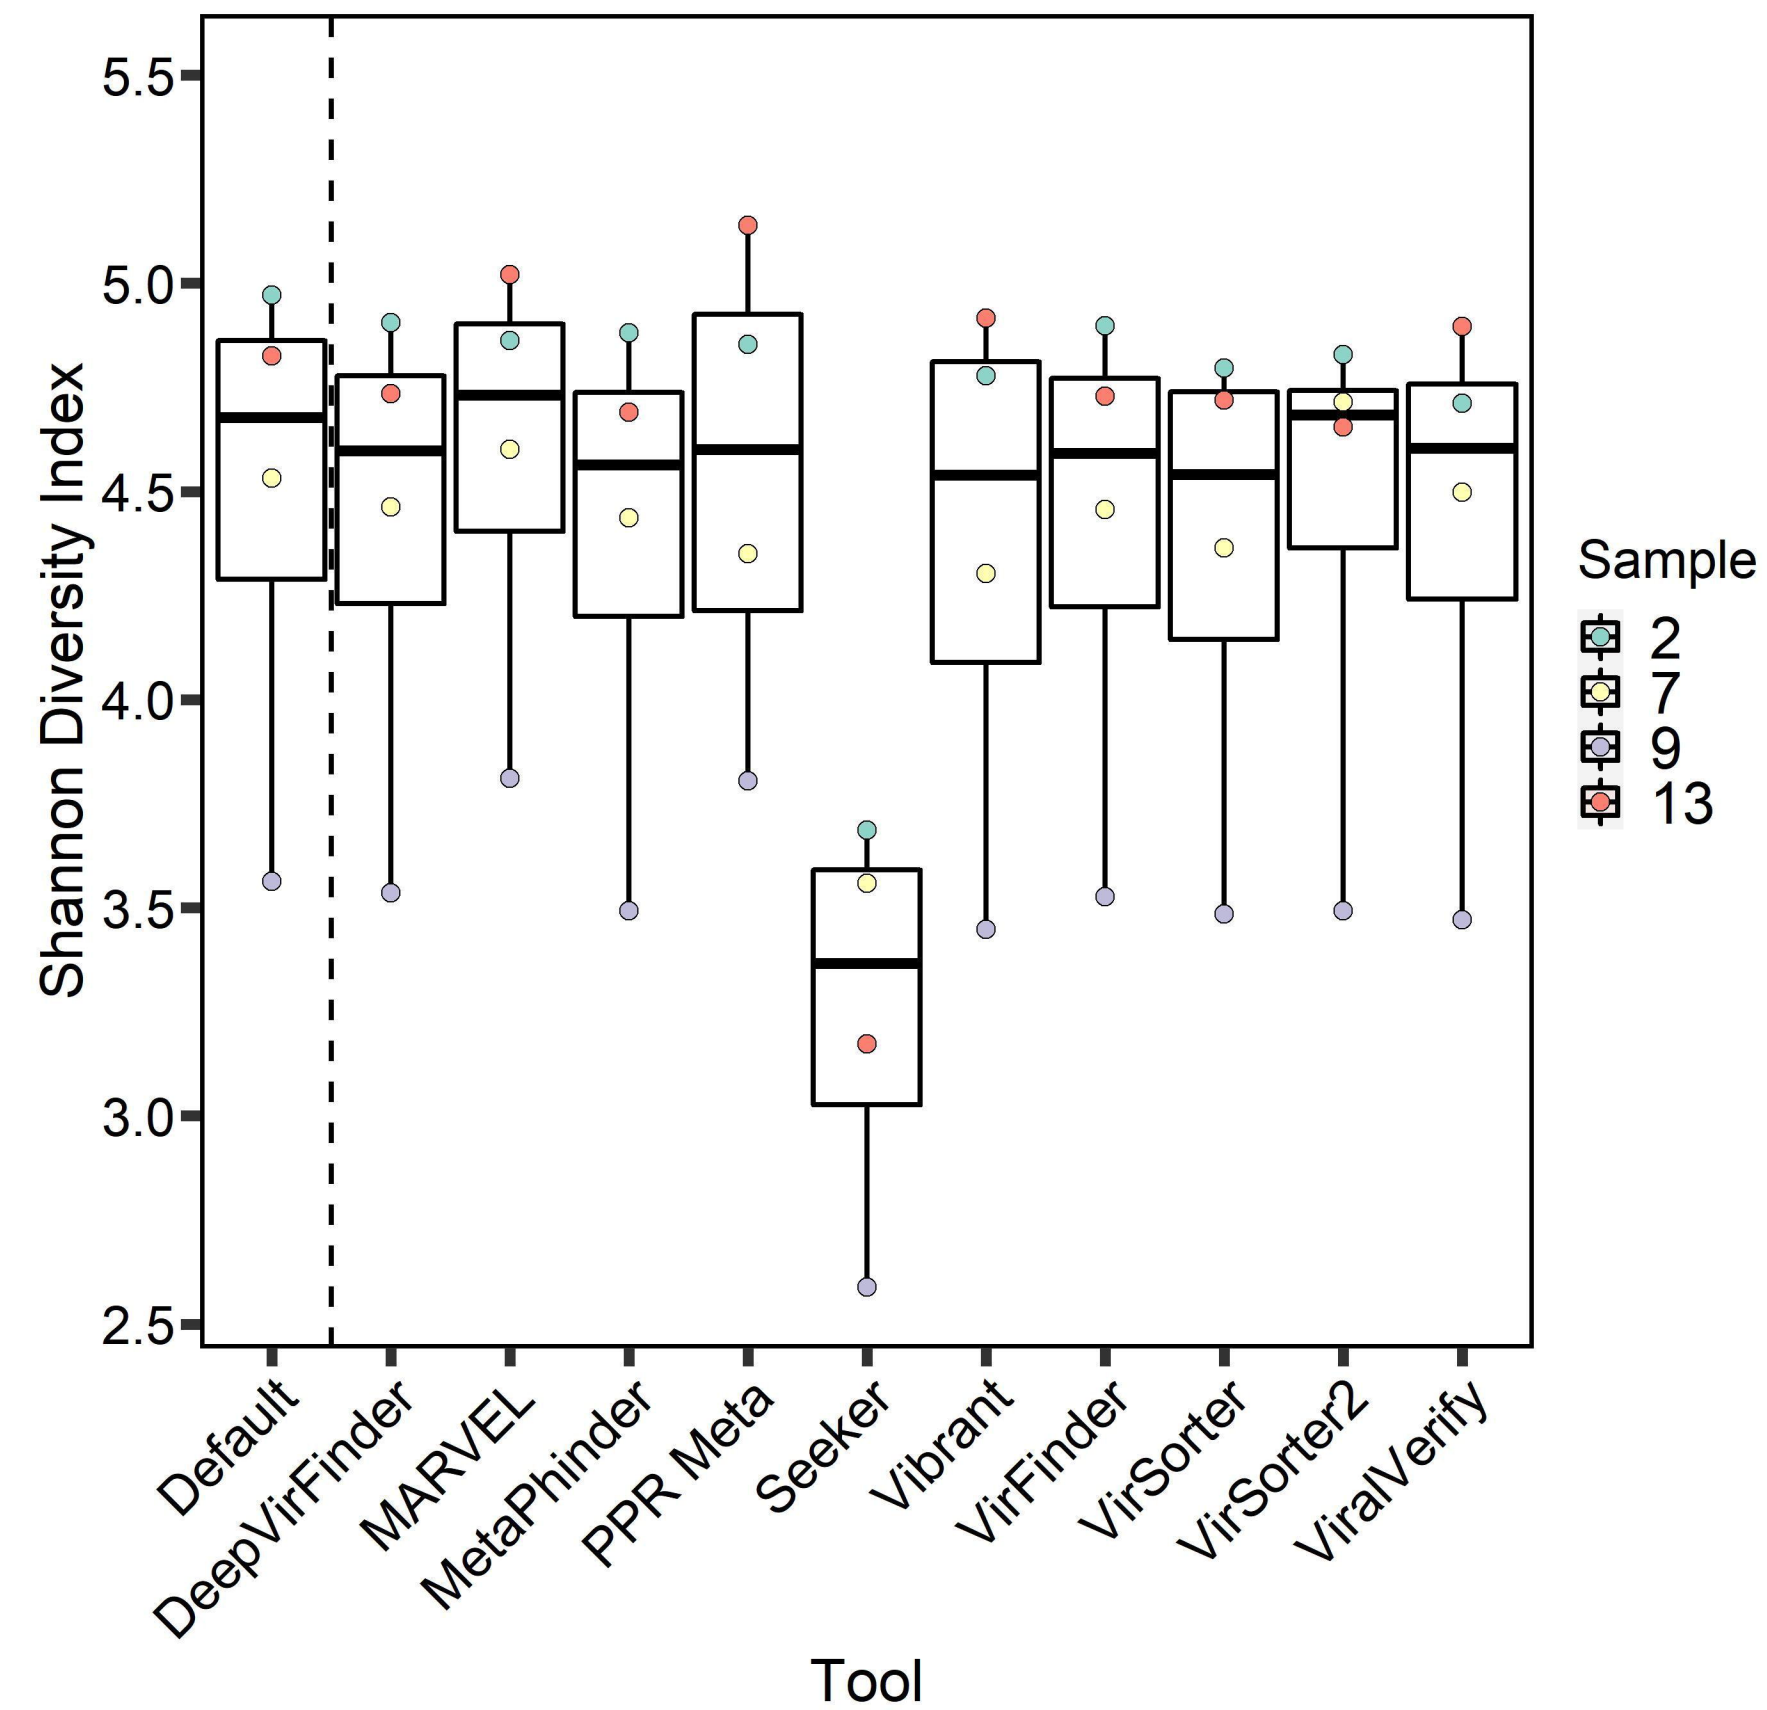**C**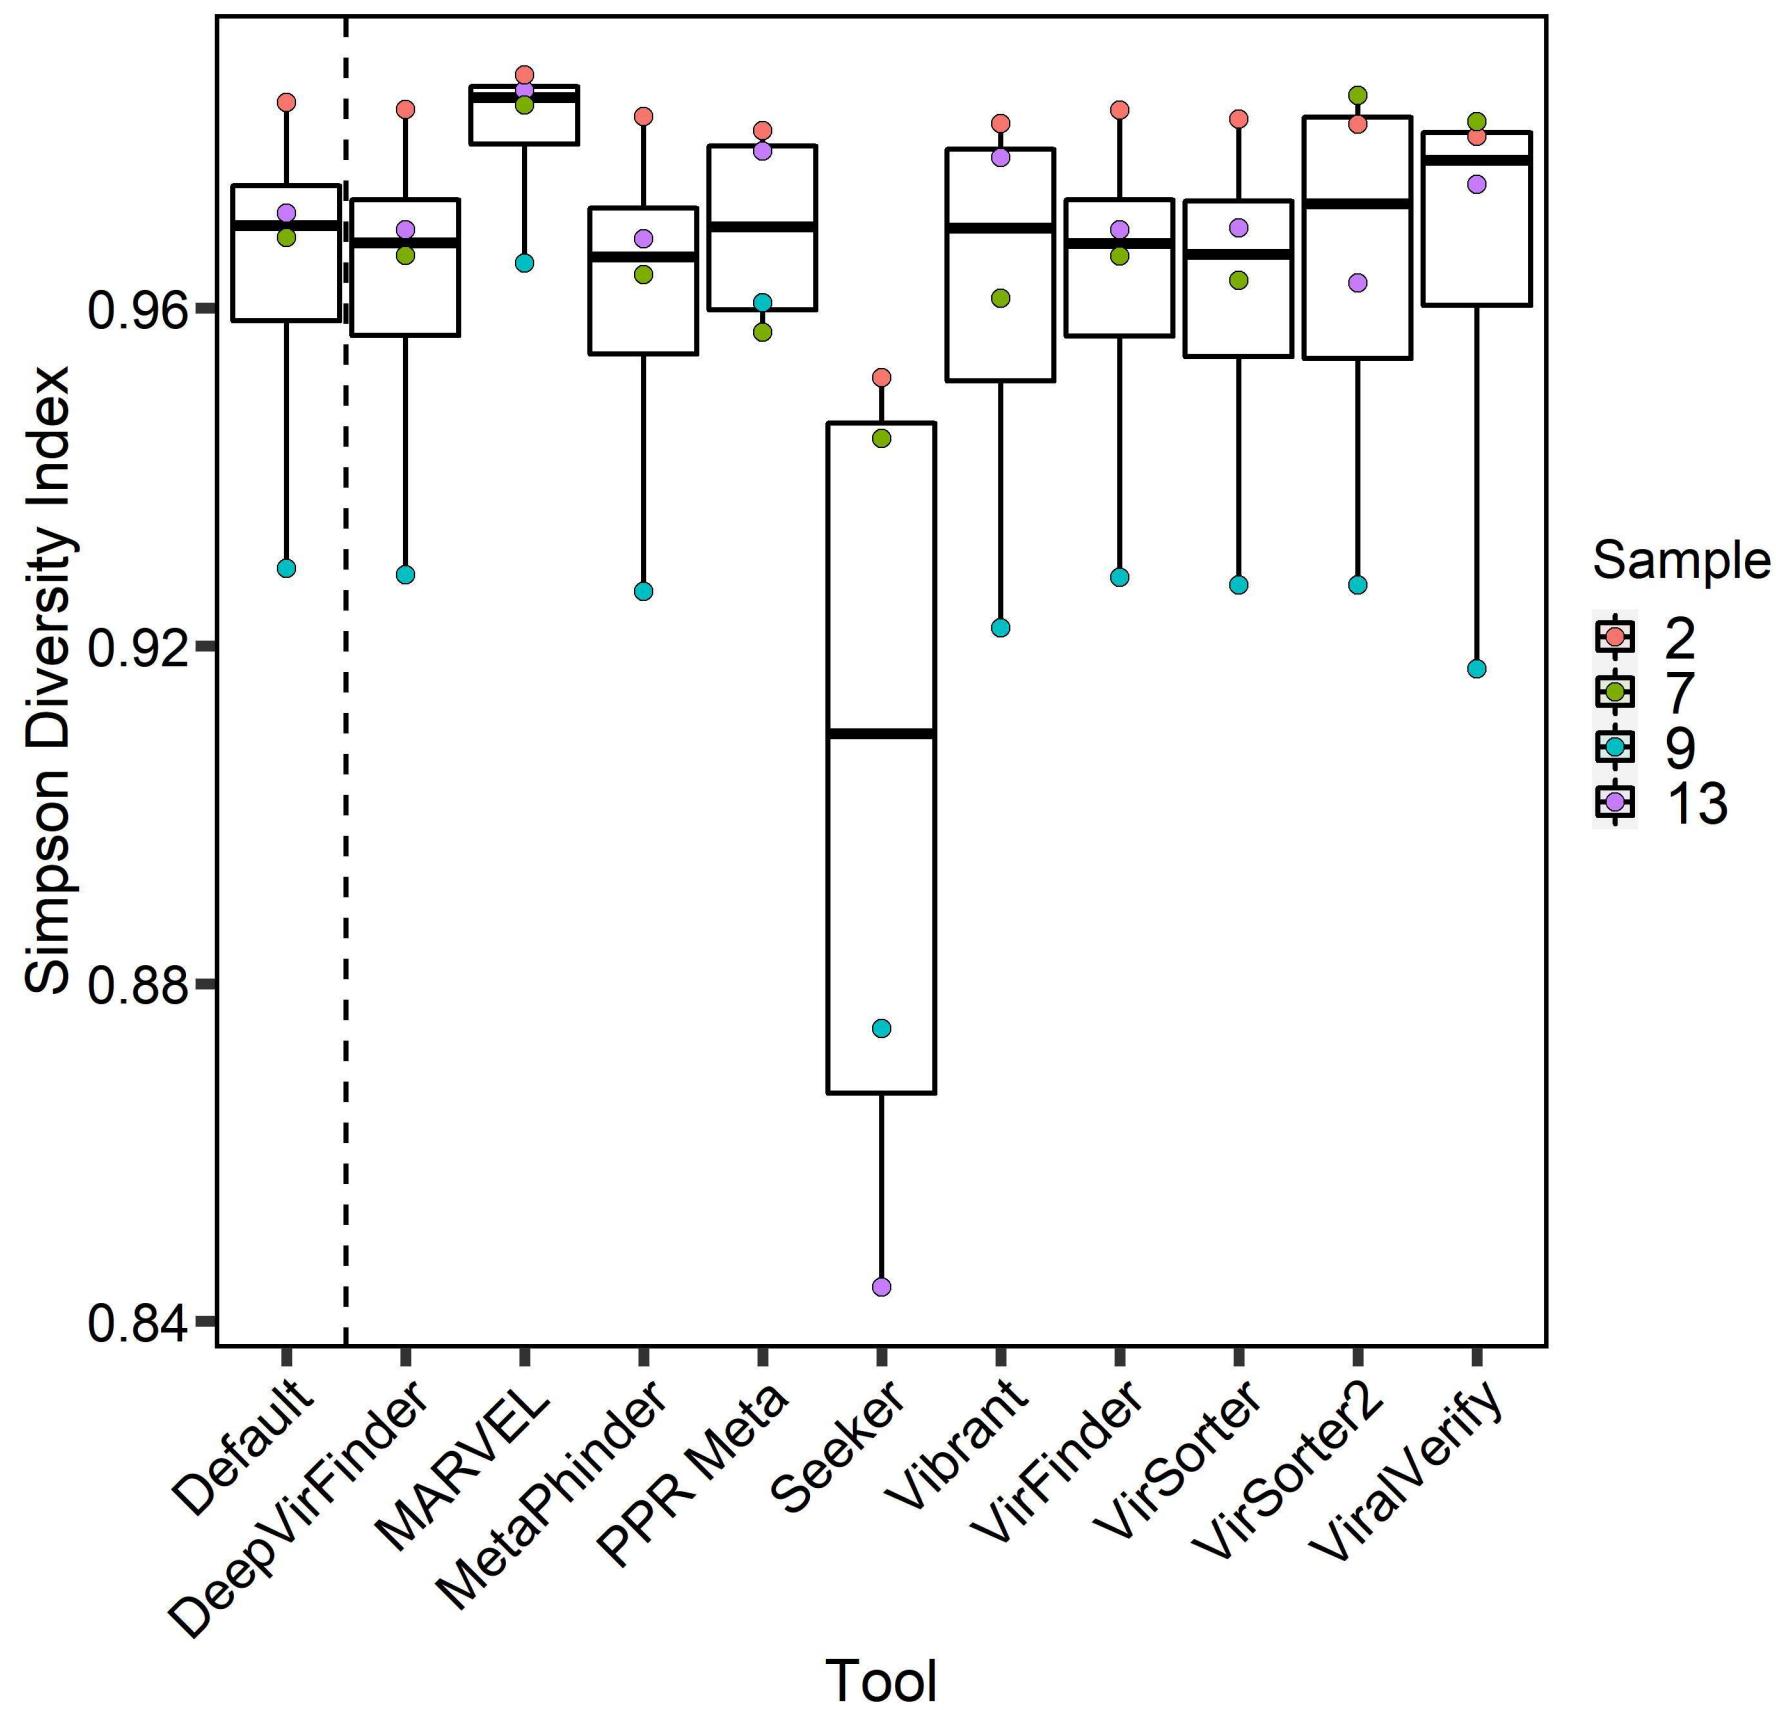**D**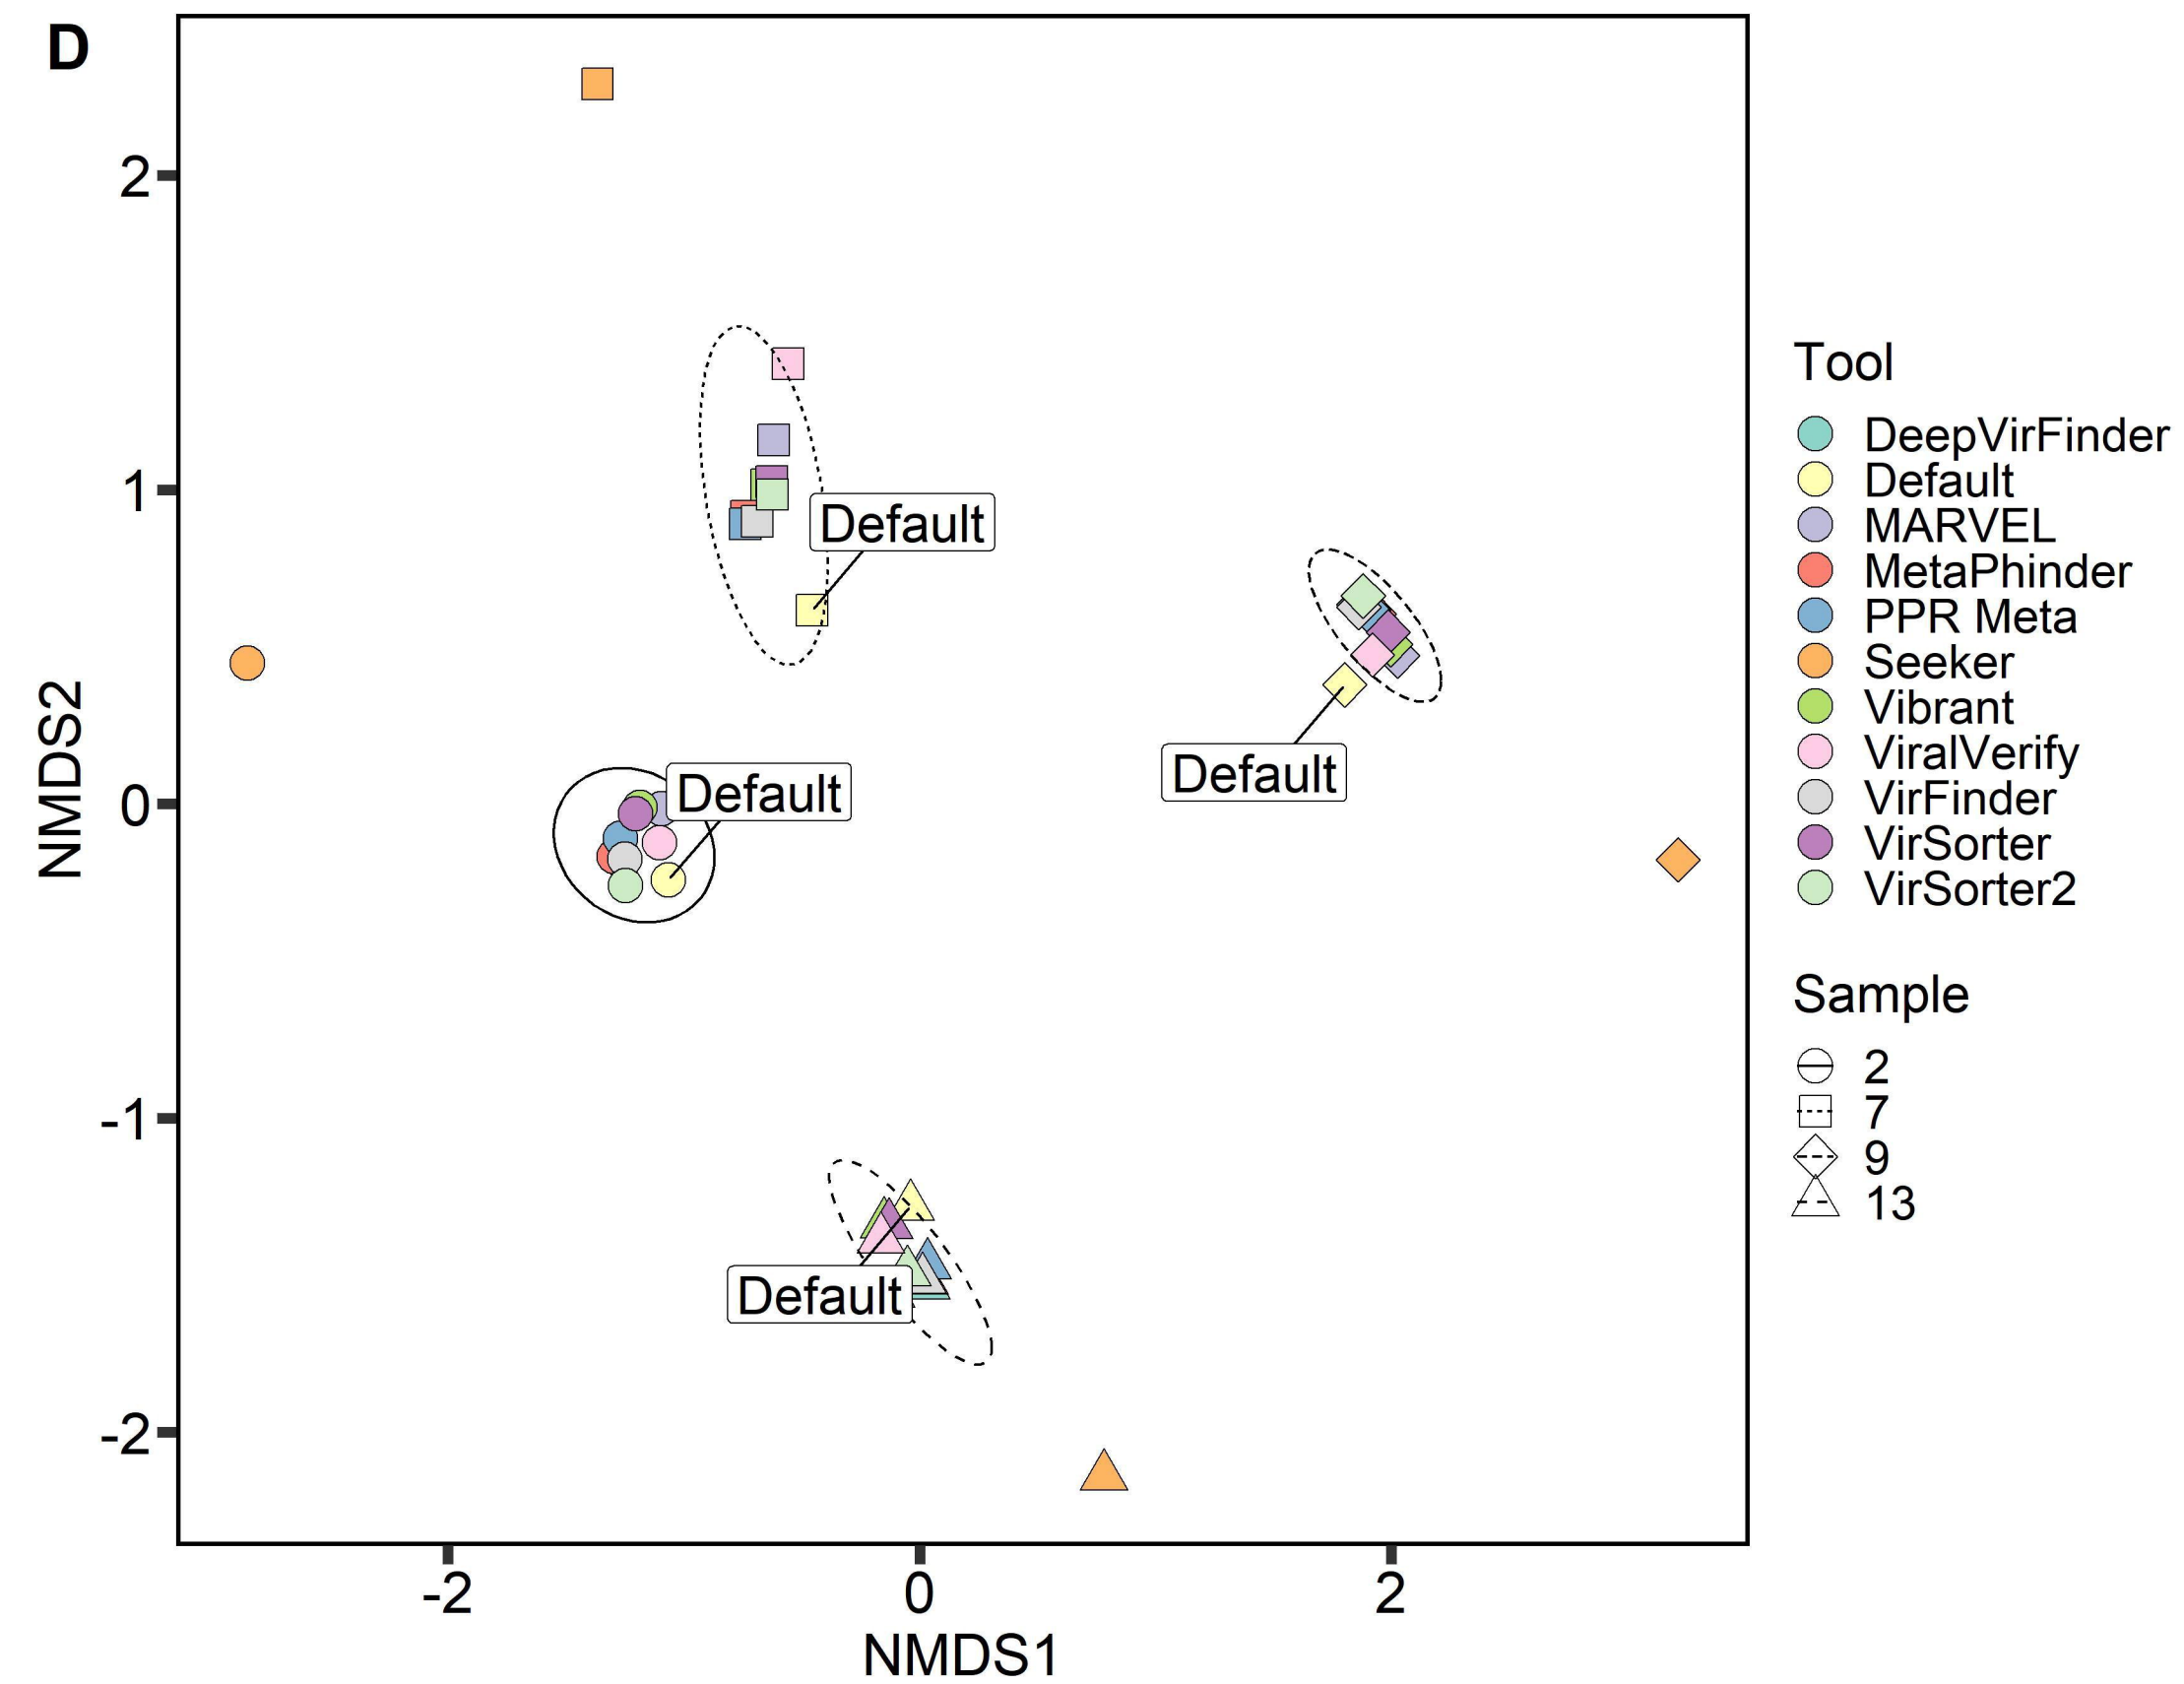

Source: https://www.biorxiv.org/content/biorxiv/early/2021/04/12/2021.04.12.438782.full.pdf
